# Supplementary material
Source: PubMed Central journal article supplement (PMC8632889)
Supplement: 41423_2021_784_MOESM1_ESM.pdf [file 41423_2021_784_MOESM1_ESM.pdf]

Supplementary Tables and Figures for manuscript “Screening of HLA-A restricted T cell epitopes of SARS-CoV-2 and induction of CD8<sup>+</sup> T cell responses in HLA-A transgenic mice”, authored by Xiaoxiao Jin, et al.

Table S1 270 T cell epitopes of SARS-CoV-2 *in silico* predicted were synthesized for further validation.

| Protein   | Epitope     | Predicted HLA-A allele | Epitope sequence | Start Position | End position |
|-----------|-------------|------------------------|------------------|----------------|--------------|
| E protein | A1          | HLA-A*02:01            | FLAFVVFL         | 20             | 28           |
|           | A2          | HLA-A*02:01            | SLVKPSFYV        | 50             | 58           |
|           | A3          | HLA-A*02:01            | VLLFLAFVV        | 17             | 25           |
|           | A4          | HLA-A*02:01            | FLLVTLAIL        | 26             | 34           |
|           | A5          | HLA-A*02:01            | RLCAYCCNIV       | 38             | 47           |
|           | A6          | HLA-A*02:07            | SVLLFLAFV        | 16             | 24           |
|           | A7          | HLA-A*02:07            | LFLAFVVFL        | 19             | 28           |
|           | A8          | HLA-A*02:06            | FVVFLLVTL        | 23             | 31           |
|           | A9          | HLA-A*02:06            | LIVNSVLLFL       | 12             | 21           |
|           | A10         | HLA-A*02:03            | FLAFVVFLV        | 20             | 29           |
|           | A11         | HLA-A*02:03            | FVSEETGTL        | 4              | 12           |
|           | A12         | HLA-A*11:01            | NIVNVSLVK        | 45             | 53           |
|           | A13         | HLA-A*11:01            | VTAILTALR        | 29             | 38           |
|           | A14         | HLA-A*11:01            | SLVKPSFYVY       | 50             | 59           |
|           | A15         | HLA-A*11:01            | SFYVYSRVK        | 55             | 63           |
|           | A16         | HLA-A*11:01            | TLAILTALR        | 30             | 38           |
|           | A17         | HLA-A*11:02            | LVKPSFYVY        | 51             | 59           |
|           | A18         | HLA-A*11:02            | RVKNLNSSR        | 61             | 69           |
|           | A19         | HLA-A*11:02            | VSLVKPSFY        | 49             | 57           |
|           | A20         | HLA-A*24:02            | VLLVTLAI         | 25             | 33           |
| A21       | HLA-A*24:02 | VLLFLAFVVF             | 17               | 26             |              |
| A22       | HLA-A*24:02 | TLIVNSVLLF             | 11               | 20             |              |
| A23       | HLA-A*24:02 | VNSVLLFLAF             | 14               | 23             |              |
| A24       | HLA-A*33:03 | KPSFYVYSR              | 53               | 61             |              |
| A25       | HLA-A*30:01 | SSRVPDLLV              | 67               | 75             |              |
| A26       | HLA-A*30:01 | IVNSVLLFL              | 13               | 21             |              |
| M protein | B1          | HLA-A*02:01            | GLMWLSYFI        | 89             | 97           |
|           | B2          | HLA-A*02:01            | KLLEQWNLV        | 15             | 23           |
|           | B3          | HLA-A*02:01            | FVLAAYRI         | 65             | 73           |
|           | B4          | HLA-A*02:01            | FLFLTWICLL       | 26             | 35           |
|           | B5          | HLA-A*02:01            | LIFLWLLWPV       | 51             | 60           |

|           |     |             |             |     |     |
|-----------|-----|-------------|-------------|-----|-----|
|           | B6  | HLA-A*02:01 | TLACFVLA AV | 61  | 70  |
|           | B7  | HLA-A*02:01 | FLWLLWPVTL  | 53  | 62  |
|           | B8  | HLA-A*02:07 | SMWSFN PET  | 108 | 116 |
|           | B9  | HLA-A*02:07 | LLWPVTLAC   | 56  | 64  |
|           | B10 | HLA-A*02:07 | FLYIIKLIFL  | 45  | 54  |
|           | B11 | HLA-A*02:06 | IAMACLVGL   | 82  | 90  |
|           | B12 | HLA-A*02:06 | VTLACFVLA   | 60  | 68  |
|           | B13 | HLA-A*02:06 | LVIGFLFLT   | 22  | 30  |
|           | B14 | HLA-A*02:06 | YIIKLIFLWL  | 47  | 56  |
|           | B15 | HLA-A*02:03 | FIASFRLFA   | 96  | 104 |
|           | B16 | HLA-A*02:03 | ILRGHLRIA   | 144 | 152 |
|           | B17 | HLA-A*02:03 | AMACLVGLM   | 83  | 91  |
|           | B18 | HLA-A*11:01 | ATSRTLSYK   | 171 | 180 |
|           | B19 | HLA-A*11:01 | GTITVEELK   | 6   | 14  |
|           | B20 | HLA-A*11:01 | LSYFIASFR   | 93  | 101 |
|           | B21 | HLA-A*11:01 | YSRYRIGNYK  | 196 | 205 |
|           | B22 | HLA-A*11:01 | AVILRGHLR   | 142 | 150 |
|           | B23 | HLA-A*11:01 | LVIGAVILR   | 138 | 146 |
|           | B24 | HLA-A*11:01 | FIASFRLFAR  | 96  | 105 |
|           | B25 | HLA-A*11:02 | RIAGHHLGR   | 150 | 158 |
|           | B26 | HLA-A*24:02 | SYFIASFRLF  | 94  | 103 |
|           | B27 | HLA-A*24:02 | MWLSYFIASF  | 91  | 100 |
|           | B28 | HLA-A*24:02 | LYIIKLIFLW  | 46  | 55  |
|           | B29 | HLA-A*24:02 | QWNLVIGFLF  | 19  | 28  |
|           | B30 | HLA-A*24:02 | LWPVTLACF   | 57  | 65  |
|           | B31 | HLA-A*24:02 | RFLYIIKLIF  | 44  | 53  |
|           | B32 | HLA-A*33:03 | IASFRLFAR   | 97  | 105 |
|           | B33 | HLA-A*33:03 | QFAYANRNR   | 36  | 44  |
|           | B34 | HLA-A*33:03 | SFRLFARTR   | 99  | 107 |
|           | B35 | HLA-A*33:03 | YYKLGASQR   | 178 | 186 |
|           | B36 | HLA-A*30:01 | RTRSMWSFN   | 105 | 113 |
|           | B37 | HLA-A*30:01 | RNRFLYIIK   | 42  | 50  |
|           | B38 | HLA-A*30:01 | TSRTLSYK    | 172 | 180 |
|           | B39 | HLA-A*30:01 | ANRNRFLYI   | 40  | 48  |
|           | B40 | HLA-A*30:01 | RYRIGNYKL   | 198 | 206 |
|           | B41 | HLA-A*30:01 | HLRIAGHHL   | 148 | 156 |
|           | B42 | HLA-A*30:01 | RVAGDSGFA   | 186 | 194 |
| N protein | C1  | HLA-A*02:01 | LLDRLNQL    | 222 | 230 |
|           | C2  | HLA-A*02:01 | GMSRIGMEV   | 316 | 324 |
|           | C3  | HLA-A*02:01 | WLTYTGAIKL  | 330 | 339 |
|           | C4  | HLA-A*02:01 | YLGTPPEAGL  | 112 | 121 |
|           | C5  | HLA-A*02:01 | ALALLLDRL   | 218 | 227 |
|           | C6  | HLA-A*02:01 | IHWVATEGA   | 130 | 138 |

|  |     |             |             |     |     |
|--|-----|-------------|-------------|-----|-----|
|  | C7  | HLA-A*02:01 | ILLNKHIDA   | 351 | 359 |
|  | C8  | HLA-A*02:07 | DLDDFSKQL   | 399 | 407 |
|  | C9  | HLA-A*02:07 | KLDDKDPNF   | 338 | 346 |
|  | C10 | HLA-A*02:06 | QTVTLLPAA   | 390 | 398 |
|  | C11 | HLA-A*02:06 | LQLPQGTTL   | 159 | 167 |
|  | C12 | HLA-A*02:06 | NTASWFTAL   | 48  | 56  |
|  | C13 | HLA-A*02:06 | TTLPKGIFYA  | 165 | 173 |
|  | C14 | HLA-A*02:06 | RTATKAYNV   | 262 | 270 |
|  | C15 | HLA-A*02:06 | QIAQFAPSA   | 303 | 311 |
|  | C16 | HLA-A*02:06 | LALLLLDRL   | 219 | 227 |
|  | C17 | HLA-A*02:03 | QLQQSMSSA   | 406 | 414 |
|  | C18 | HLA-A*02:03 | RMAGNGGDA   | 209 | 217 |
|  | C19 | HLA-A*02:03 | SAFFGMSRI   | 312 | 320 |
|  | C20 | HLA-A*11:01 | ASAFFGMSR   | 311 | 319 |
|  | C21 | HLA-A*11:01 | ATEGALNTPK  | 134 | 143 |
|  | C22 | HLA-A*11:01 | KSAAEASKK   | 249 | 257 |
|  | C23 | HLA-A*11:01 | FTALTQHGK   | 53  | 61  |
|  | C24 | HLA-A*11:01 | QLPQGTTLPK  | 160 | 169 |
|  | C25 | HLA-A*11:01 | LLNKHIDAYK  | 352 | 361 |
|  | C26 | HLA-A*11:01 | AGLPYGANK   | 119 | 127 |
|  | C27 | HLA-A*11:01 | QQQGQTVTK   | 240 | 248 |
|  | C28 | HLA-A*11:01 | VTPSGTWLTY  | 324 | 333 |
|  | C29 | HLA-A*11:02 | KTFPPTPEPK  | 361 | 369 |
|  | C30 | HLA-A*24:02 | YYRRATRRI   | 86  | 94  |
|  | C31 | HLA-A*24:02 | QFAPSASAFF  | 306 | 315 |
|  | C32 | HLA-A*24:02 | KHIDAYKTF   | 355 | 363 |
|  | C33 | HLA-A*24:02 | TWLYTGTGAI  | 329 | 337 |
|  | C34 | HLA-A*24:02 | GYYRRATRRI  | 85  | 94  |
|  | C35 | HLA-A*24:02 | LSPRWYFYYL  | 104 | 113 |
|  | C36 | HLA-A*30:01 | RSRNSSRNS   | 189 | 197 |
|  | C37 | HLA-A*30:01 | GTRNPANNA   | 147 | 155 |
|  | C38 | HLA-A*30:01 | SSRGTSPAR   | 201 | 209 |
|  | C39 | HLA-A*30:01 | RSKQRRPQG   | 36  | 44  |
|  | C40 | HLA-A*30:01 | LIRQGTDYK   | 291 | 299 |
|  | C41 | HLA-A*30:01 | SSRNSTPGS   | 193 | 201 |
|  | C42 | HLA-A*30:01 | SSRSSRSR    | 183 | 191 |
|  | C43 | HLA-A*30:01 | RQKRTATKA   | 259 | 267 |
|  | C44 | HLA-A*30:01 | SSRSRNSSR   | 187 | 195 |
|  | C45 | HLA-A*33:03 | NVTQAFGRR   | 269 | 277 |
|  | C46 | HLA-A*33:03 | IGYYRRATR   | 84  | 92  |
|  | C47 | HLA-A*33:03 | NTPKDHIGTR  | 140 | 149 |
|  | C48 | HLA-A*33:03 | QASSRSSSR   | 181 | 189 |
|  | C49 | HLA-A*11:02 | YKTFPPTPEPK | 360 | 369 |

|           |     |             |            |      |      |
|-----------|-----|-------------|------------|------|------|
| S protein | D1  | HLA-A*02:01 | YLQPRTFLL  | 269  | 277  |
|           | D2  | HLA-A*02:01 | FIAGLIAIV  | 1220 | 1228 |
|           | D3  | HLA-A*02:01 | ELLHAPATV  | 516  | 524  |
|           | D4  | HLA-A*02:01 | SIIAYTMSL  | 691  | 699  |
|           | D5  | HLA-A*02:01 | KLNDLCFTNV | 386  | 395  |
|           | D6  | HLA-A*02:01 | RLDKVEAEV  | 983  | 991  |
|           | D7  | HLA-A*02:01 | VLNDILSRL  | 976  | 984  |
|           | D8  | HLA-A*02:01 | FTISVTTEI  | 718  | 726  |
|           | D9  | HLA-A*02:01 | LLFNKVTLA  | 821  | 829  |
|           | D10 | HLA-A*02:01 | KIADYNYKL  | 417  | 425  |
|           | D11 | HLA-A*02:01 | VVFLHVITYV | 1060 | 1068 |
|           | D12 | HLA-A*02:01 | FVFLVLLPLV | 2    | 11   |
|           | D13 | HLA-A*02:01 | MIAQYTSAL  | 869  | 877  |
|           | D14 | HLA-A*02:01 | GLIAIVMVTI | 1223 | 1232 |
|           | D15 | HLA-A*02:01 | SVTTEILPV  | 721  | 729  |
|           | D16 | HLA-A*02:07 | KLPDDFTGCV | 424  | 433  |
|           | D17 | HLA-A*02:07 | RLQSLQTYV  | 1000 | 1008 |
|           | D18 | HLA-A*02:07 | LLPLVSSQCV | 7    | 16   |
|           | D19 | HLA-A*02:06 | AVDCALDPL  | 288  | 296  |
|           | D20 | HLA-A*02:06 | KQLSSNFGA  | 964  | 972  |
|           | D21 | HLA-A*02:06 | FQFCNDPFL  | 133  | 141  |
|           | D22 | HLA-A*02:06 | MQMAYRFNGI | 900  | 909  |
|           | D23 | HLA-A*02:06 | YQDVNCTEV  | 612  | 620  |
|           | D24 | HLA-A*02:06 | KQIYKTPPI  | 786  | 794  |
|           | D25 | HLA-A*02:06 | LQIPFAMQM  | 894  | 902  |
|           | D26 | HLA-A*02:06 | LQSYGFQPT  | 492  | 500  |
|           | D27 | HLA-A*02:06 | NTQEVFAQV  | 777  | 785  |
|           | D28 | HLA-A*02:06 | TQLNRALTGI | 761  | 770  |
|           | D29 | HLA-A*02:03 | HLMSFPQSA  | 1048 | 1056 |
|           | D30 | HLA-A*02:03 | FLHVITYVPA | 1062 | 1070 |
|           | D31 | HLA-A*02:03 | QLNRALTGI  | 762  | 770  |
|           | D32 | HLA-A*02:03 | FKIYSKHTPI | 201  | 210  |
|           | D33 | HLA-A*02:03 | FVSNGTHWFV | 1095 | 1104 |
|           | D34 | HLA-A*11:01 | GVYFASTEK  | 89   | 97   |
|           | D35 | HLA-A*11:01 | MTSCCCLK   | 1237 | 1245 |
|           | D36 | HLA-A*11:01 | RLFRKSNLK  | 454  | 462  |
|           | D37 | HLA-A*11:01 | SSTASALGK  | 939  | 947  |
|           | D38 | HLA-A*11:01 | NSASFSTFK  | 370  | 378  |
|           | D39 | HLA-A*11:01 | VTLADAGFIK | 826  | 835  |
|           | D40 | HLA-A*11:01 | CTLKSFTVEK | 301  | 310  |
|           | D41 | HLA-A*11:01 | SLIDLQELGK | 1196 | 1205 |
|           | D42 | HLA-A*11:01 | FIEDLLFNK  | 817  | 825  |
|           | D43 | HLA-A*11:01 | EILPVSMTK  | 725  | 733  |

|              |     |             |            |      |      |
|--------------|-----|-------------|------------|------|------|
|              | D44 | HLA-A*11:01 | AQALNTLVK  | 956  | 964  |
|              | D45 | HLA-A*11:01 | QIYKTPPIK  | 787  | 795  |
|              | D46 | HLA-A*11:02 | VTYVPAQEK  | 1065 | 1073 |
|              | D47 | HLA-A*11:02 | ASANLAATK  | 1020 | 1028 |
|              | D48 | HLA-A*11:02 | GTHWFVTQR  | 1099 | 1107 |
|              | D49 | HLA-A*11:02 | GVLTESNKK  | 550  | 558  |
|              | D50 | HLA-A*11:02 | GVYYHKNNK  | 142  | 150  |
|              | D51 | HLA-A*24:02 | QYIKWPWYI  | 1208 | 1216 |
|              | D52 | HLA-A*24:02 | VYAWNRKRI  | 350  | 358  |
|              | D53 | HLA-A*24:02 | NYNYLYRLF  | 448  | 456  |
|              | D54 | HLA-A*24:02 | VYSTGSNVF  | 635  | 643  |
|              | D55 | HLA-A*24:02 | PYRVVVLFS  | 507  | 515  |
|              | D56 | HLA-A*24:02 | LYNSASFSTF | 368  | 377  |
|              | D57 | HLA-A*24:02 | VYSSANNCTF | 159  | 168  |
|              | D58 | HLA-A*24:02 | CYFPLQSYGF | 488  | 497  |
|              | D59 | HLA-A*24:02 | PFAMQMAYRF | 897  | 906  |
|              | D60 | HLA-A*24:02 | TYVPAQEKNF | 1066 | 1075 |
|              | D61 | HLA-A*24:02 | IYSKHTPINL | 203  | 212  |
|              | D62 | HLA-A*24:02 | IYKTPPIKDF | 788  | 797  |
|              | D63 | HLA-A*24:02 | TFEYVSQPF  | 167  | 175  |
|              | D64 | HLA-A*24:02 | CFTNVYADSF | 391  | 400  |
|              | D65 | HLA-A*30:01 | ATRFASVYA  | 344  | 352  |
|              | D66 | HLA-A*30:01 | ITRFQTLA   | 235  | 243  |
|              | D67 | HLA-A*30:01 | TTRTQLPPA  | 19   | 27   |
|              | D68 | HLA-A*30:01 | KCYGVSPTK  | 378  | 386  |
|              | D69 | HLA-A*30:01 | AYRFNGIGV  | 903  | 911  |
|              | D70 | HLA-A*30:01 | RKRISNCVA  | 355  | 363  |
|              | D71 | HLA-A*30:01 | KNLREFVFK  | 187  | 195  |
|              | D72 | HLA-A*30:01 | ASVYAWNRK  | 348  | 356  |
|              | D73 | HLA-A*30:01 | RARVASQSI  | 683  | 692  |
|              | D74 | HLA-A*30:01 | GTKRFDNPV  | 75   | 83   |
|              | D75 | HLA-A*30:01 | HVSGTNGTK  | 69   | 77   |
|              | D76 | HLA-A*33:03 | SVYAWNRKR  | 349  | 357  |
|              | D77 | HLA-A*33:03 | VYYPDKVFR  | 36   | 44   |
|              | D78 | HLA-A*33:03 | QTNSPRRAR  | 677  | 685  |
|              | D79 | HLA-A*33:03 | NVYADSFVIR | 394  | 403  |
|              | D80 | HLA-A*33:03 | YYVGYLQPR  | 265  | 273  |
|              | D81 | HLA-A*33:03 | GIYQTSNFR  | 311  | 319  |
|              | D82 | HLA-A*33:03 | NGVGYPYR   | 501  | 509  |
|              | D83 | HLA-A*33:03 | STGSNVFQTR | 637  | 646  |
| RdRp protein | R1  | HLA-A*02:01 | LLMPILTLT  | 240  | 248  |
|              | R2  | HLA-A*02:01 | TMADLVYAL  | 123  | 131  |
|              | R3  | HLA-A*02:01 | LMIERFVSL  | 854  | 862  |

|  |     |             |            |     |     |
|--|-----|-------------|------------|-----|-----|
|  | R4  | HLA-A*02:01 | AMRNAGIVGV | 195 | 204 |
|  | R5  | HLA-A*02:01 | SLAIDAYPL  | 861 | 869 |
|  | R6  | HLA-A*02:01 | NLLKDCPAV  | 88  | 96  |
|  | R7  | HLA-A*02:01 | NLIDSYFVV  | 64  | 72  |
|  | R8  | HLA-A*02:01 | FVNEFYAYL  | 741 | 749 |
|  | R9  | HLA-A*02:01 | ILHCANFNV  | 307 | 315 |
|  | R10 | HLA-A*02:01 | KIFVDGVPFV | 332 | 341 |
|  | R11 | HLA-A*02:01 | VMCGGSLYV  | 667 | 675 |
|  | R12 | HLA-A*02:01 | MLDMYSVML  | 899 | 907 |
|  | R13 | HLA-A*02:01 | NMLRIMASL  | 628 | 636 |
|  | R14 | HLA-A*02:01 | RLANECAQV  | 654 | 662 |
|  | R15 | HLA-A*02:01 | QLLFVVEVV  | 468 | 476 |
|  | R16 | HLA-A*02:07 | FVDGVPFVV  | 334 | 342 |
|  | R17 | HLA-A*02:07 | YLPYDPSRI  | 828 | 837 |
|  | R18 | HLA-A*02:07 | FPPTSFGPLV | 321 | 330 |
|  | R19 | HLA-A*02:06 | RQLLFVVEV  | 467 | 475 |
|  | R20 | HLA-A*02:06 | RILGAGCFV  | 836 | 844 |
|  | R21 | HLA-A*02:06 | SVAALTNNV  | 397 | 405 |
|  | R22 | HLA-A*02:06 | MILSDDAVV  | 756 | 764 |
|  | R23 | HLA-A*02:06 | LSFKELLVYA | 366 | 375 |
|  | R24 | HLA-A*02:03 | MLKTVYSDV  | 601 | 609 |
|  | R25 | HLA-A*02:03 | MLRIMASLV  | 629 | 637 |
|  | R26 | HLA-A*02:03 | SLSHRFYRL  | 647 | 655 |
|  | R27 | HLA-A*02:03 | AMYPHTVL   | 923 | 931 |
|  | R28 | HLA-A*02:03 | SIAATRGATV | 578 | 587 |
|  | R29 | HLA-A*02:03 | LLSTDGNKI  | 707 | 715 |
|  | R30 | HLA-A*11:01 | ASGNLLLDK  | 383 | 391 |
|  | R31 | HLA-A*11:01 | TSFGPLVRK  | 324 | 332 |
|  | R32 | HLA-A*11:01 | KSAGPFNFK  | 500 | 508 |
|  | R33 | HLA-A*11:01 | KVAGFAKFLK | 41  | 50  |
|  | R34 | HLA-A*11:01 | MTNRQFHQK  | 566 | 574 |
|  | R35 | HLA-A*11:01 | AVAKHDFFK  | 95  | 103 |
|  | R36 | HLA-A*11:01 | AIDAYPLTK  | 863 | 871 |
|  | R37 | HLA-A*11:01 | LVASIKNFK  | 775 | 783 |
|  | R38 | HLA-A*11:01 | VVSTGYHFR  | 341 | 349 |
|  | R39 | HLA-A*11:01 | TVKPGNFNK  | 409 | 417 |
|  | R40 | HLA-A*11:01 | KTNCCRFQEK | 50  | 59  |
|  | R41 | HLA-A*11:01 | AISDYDYR   | 449 | 457 |
|  | R42 | HLA-A*11:01 | CSQHTMLVK  | 813 | 821 |
|  | R43 | HLA-A*11:01 | CSLSHRFYR  | 646 | 654 |
|  | R44 | HLA-A*11:01 | GTSTDVVYR  | 25  | 33  |
|  | R45 | HLA-A*11:02 | ATVVIGTSK  | 585 | 593 |
|  | R46 | HLA-A*11:02 | KLFDYFKY   | 281 | 289 |

|  |     |             |            |     |     |
|--|-----|-------------|------------|-----|-----|
|  | R47 | HLA-A*24:02 | SYYSLLMPI  | 236 | 244 |
|  | R48 | HLA-A*24:02 | SYFVVKRHTF | 68  | 77  |
|  | R49 | HLA-A*24:02 | AYANSVFNI  | 688 | 696 |
|  | R50 | HLA-A*24:02 | YFNKKDWYDF | 156 | 165 |
|  | R51 | HLA-A*24:02 | FYGGWHNML  | 594 | 602 |
|  | R52 | HLA-A*24:02 | IYNDKVAGF  | 37  | 45  |
|  | R53 | HLA-A*24:02 | RYNLPTMCDI | 457 | 466 |
|  | R54 | HLA-A*24:02 | KYVRNLQHRL | 718 | 727 |
|  | R55 | HLA-A*24:02 | NFNKDFYDF  | 414 | 422 |
|  | R56 | HLA-A*24:02 | EYADVFHLYL | 876 | 885 |
|  | R57 | HLA-A*24:02 | FYAYLRKHF  | 745 | 753 |
|  | R58 | HLA-A*24:02 | TYHPNCVNCL | 293 | 302 |
|  | R59 | HLA-A*24:02 | LYLQYIRKL  | 883 | 891 |
|  | R60 | HLA-A*30:01 | ATRGATVVI  | 581 | 589 |
|  | R61 | HLA-A*30:01 | RLKLFDRYFK | 279 | 288 |
|  | R62 | HLA-A*30:01 | RVRQALLKT  | 181 | 189 |
|  | R63 | HLA-A*30:01 | RQFHQKLLK  | 569 | 577 |
|  | R64 | HLA-A*30:01 | HISRQLTK   | 113 | 121 |
|  | R65 | HLA-A*30:01 | KARLYYDSM  | 511 | 519 |
|  | R66 | HLA-A*33:03 | DFYDFAVSK  | 418 | 426 |
|  | R67 | HLA-A*33:03 | MVPHISRQR  | 110 | 118 |
|  | R68 | HLA-A*33:03 | LLKSIAATR  | 575 | 583 |
|  | R69 | HLA-A*33:03 | DALFAYTKR  | 525 | 533 |
|  | R70 | HLA-A*33:03 | RVCGVSAAR  | 10  | 18  |

Table S2: Homologous analyses of 120 SARS-CoV-2 CD8<sup>+</sup> T cell epitopes with SARS-CoV, common-cold HCoV and SARS-CoV-2 variants.

| Protein | Epitope | SARS-CoV-2 | SARS-CoV                   | OC43 | NL63 | HKU1 | 229E |
|---------|---------|------------|----------------------------|------|------|------|------|
| E       | A1      | FLAFVVFL   | FLAFVVFL                   | no   | no   | no   | no   |
| E       | A3      | VLLFLAFV   | VLLFLAFV                   | no   | no   | no   | no   |
| E       | A4      | FLLVTLAIL  | FLLVTLAIL                  | no   | no   | no   | no   |
| E       | A5      | RLCAYCCNIV | RLCAYCCNIV                 | no   | no   | no   | no   |
| E       | A6      | SVLLFLAFV  | SVLLFLAFV                  | no   | no   | no   | no   |
| E       | A7      | LFLAFVVFL  | LFLAFVVFL                  | no   | no   | no   | no   |
| E       | A9      | LIVNSVLLFL | LIVNSVLLFL                 | no   | no   | no   | no   |
| E       | A10     | FLAFVVFLV  | FLAFVVFLV                  | no   | no   | no   | no   |
| E       | A12     | NIVNVSLVK  | NIVNVSLVK                  | no   | no   | no   | no   |
| E       | A16     | TLAILTALR  | TLAILTALR                  | no   | no   | no   | no   |
| E       | A18     | RVKNLNSSR  | RVKNLNSS <b>E</b>          | no   | no   | no   | no   |
| E       | A19     | VSLVKPSFY  | VSLVK <b>P</b> TVY         | no   | no   | no   | no   |
| E       | A20     | VFLVTLAI   | VFLVTLAI                   | no   | no   | no   | no   |
| E       | A21     | VLLFLAFVVF | VLLFLAFVVF                 | no   | no   | no   | no   |
| E       | A22     | TLIVNSVLLF | TLIVNSVLLF                 | no   | no   | no   | no   |
| E       | A23     | VNSVLLFLAF | VNSVLLFLAF                 | no   | no   | no   | no   |
| E       | A25     | SSRVPDLLV  | SS <b>E</b> GVDPDLLV       | no   | no   | no   | no   |
| E       | A26     | IVNSVLLFL  | IVNSVLLFL                  | no   | no   | no   | no   |
| M       | B1      | GLMWLSYFI  | GLMWLSYF <b>V</b>          | no   | no   | no   | no   |
| M       | B2      | KLLEQWNLV  | <b>Q</b> LLEQWNLV          | no   | no   | no   | no   |
| M       | B3      | FVLAAYVRI  | FVLAAYVRI                  | no   | no   | no   | no   |
| M       | B4      | FLFLTWICLL | FLFL <b>A</b> WIMLL        | no   | no   | no   | no   |
| M       | B6      | TLACFVLA   | TLACFVLA                   | no   | no   | no   | no   |
| M       | B10     | FLYIIKLIFL | FLYIIKL <b>V</b> FL        | no   | no   | no   | no   |
| M       | B11     | IAMACLVGL  | IAMAC <b>I</b> VGL         | no   | no   | no   | no   |
| M       | B12     | VTLACFVLA  | VTLACFVLA                  | no   | no   | no   | no   |
| M       | B15     | FIASFRLFA  | <b>F</b> VASFRLFA          | no   | no   | no   | no   |
| M       | B16     | ILRGHLRIA  | <b>I</b> IRGHLR <b>M</b> A | no   | no   | no   | no   |
| M       | B17     | AMACLVGLM  | AMAC <b>I</b> VGLM         | no   | no   | no   | no   |
| M       | B18     | ATSRTLSEYK | ATSRTLSEYK                 | no   | no   | no   | no   |
| M       | B20     | LSYFIASFR  | LSYF <b>V</b> ASFR         | no   | no   | no   | no   |
| M       | B21     | YSRYRIGNYK | <b>Y</b> NRIRIGNYK         | no   | no   | no   | no   |
| M       | B23     | LVIGAVILR  | LVIGAVI <b>R</b>           | no   | no   | no   | no   |
| M       | B26     | SYFIASFRLF | SYF <b>V</b> ASFRLF        | no   | no   | no   | no   |
| M       | B28     | LYIIKLIFLW | LYIIKL <b>V</b> FLW        | no   | no   | no   | no   |
| M       | B29     | QWNLVIGFLF | QWNLVIGFLF                 | no   | no   | no   | no   |
| M       | B30     | LWPVTLACF  | LWPVTLACF                  | no   | no   | no   | no   |
| M       | B31     | RFLYIIKLIF | RFLYIIKL <b>V</b> F        | no   | no   | no   | no   |



|   |     |             |             |            |    |            |           |
|---|-----|-------------|-------------|------------|----|------------|-----------|
| M | B34 | SFRLFARTR   | SFRLFARTR   | no         | no | no         | SFRLFRRAR |
| M | B35 | YYKLGASQR   | YYKLGASQR   | no         | no | no         | no        |
| M | B36 | RTRSMWSFN   | RTRSMWSFN   | RTGSFWSFN  | no | RTGSWWSFN  | no        |
| M | B37 | RNRFLYIIK   | RNRFLYIIK   | no         | no | no         | no        |
| M | B38 | ANRNRFLYI   | SNRNRFLYI   | no         | no | no         | no        |
| M | B40 | RYRIGNYKL   | RYRIGNYKL   | no         | no | no         | no        |
| M | B41 | HLRIAGHHL   | HLRMAGHSL   | no         | no | no         | no        |
| N | C1  | LLDRLNQL    | LLDRLNQL    | no         | no | no         | no        |
| N | C3  | WLTYTGAIKL  | WLTYHGAIKL  | no         | no | no         | no        |
| N | C10 | QTVTLLPAA   | PTVTLLPAA   | no         | no | no         | no        |
| N | C12 | NTASWFTAL   | NTASWFTAL   | no         | no | no         | no        |
| N | C16 | LALLLLDRL   | LALLLLDRL   | no         | no | no         | no        |
| N | C17 | QLQQSMSSA   | QLQNSMSGGA  | no         | no | no         | no        |
| N | C27 | QQQGQTVTK   | QQQGQTVTK   | no         | no | no         | no        |
| N | C35 | LSPRWYFYYL  | LSPRWYFYYL  | LLPRWYFYYL | no | LLPRWYFYYL | no        |
| N | C45 | NVTQAFGRR   | NVTQAFGRR   | no         | no | no         | NVTQCFGPR |
| N | C46 | IGYYRRATR   | IGYYRRATR   | no         | no | no         | no        |
| N | C47 | NTPKDHIGTR  | NTPKDHIGTR  | no         | no | no         | no        |
| N | C49 | YKTFPPTPEPK | YKTFPPTPEPK | no         | no | no         | no        |
| S | D2  | FIAGLIAIV   | FIAGLIAIV   | no         | no | no         | no        |
| S | D5  | KLNDLCFTNV  | KLNDLCFSNV  | no         | no | no         | no        |
| S | D6  | RLDKVEAEV   | RLDKVEAEV   | no         | no | no         | no        |
| S | D12 | FVFLVLLPLV  | no          | no         | no | no         | no        |
| S | D13 | MIAQYTSAL   | MIAAYTAAL   | no         | no | no         | no        |
| S | D17 | RLQSLQTYV   | RLQSLQTYV   | no         | no | no         | no        |
| S | D26 | LQSYGFQPT   | no          | no         | no | no         | no        |
| S | D30 | FLHVTYVPA   | FLHVTYVPS   | no         | no | no         | no        |
| S | D31 | QLNRALTGI   | QLNRALSGI   | no         | no | no         | no        |
| S | D32 | FKIYSKHTPI  | no          | no         | no | no         | no        |
| S | D33 | FVSNNGTHWV  | no          | no         | no | no         | no        |
| S | D34 | GVYFASTEK   | GIYFAATEK   | no         | no | no         | no        |
| S | D38 | NSASFSTFK   | NSTFFSTFK   | no         | no | no         | no        |
| S | D40 | CTLKSFTVEK  | no          | no         | no | no         | no        |
| S | D41 | SLIDLQELGK  | SLIDLQELGK  | no         | no | no         | no        |
| S | D42 | FIEDLLFNK   | FIEDLLFNK   | AIEDLLFDK  | no | FFEDLLFDK  | no        |
| S | D46 | VTYVPAQEK   | VTYVPSQER   | no         | no | no         | no        |
| S | D47 | ASANLAATK   | ASANLAATK   | no         | no | no         | no        |
| S | D48 | GTHWFTQR    | GTSWFITQR   | no         | no | no         | no        |
| S | D50 | GVYYHKNNK   | no          | no         | no | no         | no        |
| S | D52 | VYAWNKRRI   | VYAWERKKI   | no         | no | no         | no        |
| S | D53 | NYNLYRLF    | no          | no         | no | no         | no        |
| S | D55 | PYRVVLSF    | PYRVVLSF    | no         | no | no         | no        |
| S | D56 | LYNSASFSTF  | LYNSTFFSTF  | no         | no | no         | no        |

|                |                |                   |                                     |                                     |                                     |                                     |                                     |
|----------------|----------------|-------------------|-------------------------------------|-------------------------------------|-------------------------------------|-------------------------------------|-------------------------------------|
| S              | D62            | IYKTPPIKDF        | no                                  | no                                  | no                                  | no                                  | no                                  |
| S              | D64            | CFTNVYADSF        | CF <del>S</del> NVYADSF             | no                                  | no                                  | no                                  | no                                  |
| S              | D65            | ATRFASVYA         | AT <del>K</del> FPSVYA              | no                                  | no                                  | no                                  | no                                  |
| S              | D71            | KNLREFVFK         | <del>K</del> H <del>L</del> REFVFK  | no                                  | no                                  | no                                  | no                                  |
| S              | D72            | ASVYAWNRK         | <del>P</del> SVYAW <del>E</del> RK  | no                                  | no                                  | no                                  | no                                  |
| S              | D76            | SVYAWNRKR         | SVYAW <del>E</del> R <del>R</del> K | no                                  | no                                  | no                                  | no                                  |
| S              | D77            | VYYPDKVFR         | VYYP <del>D</del> E <del>I</del> FR | no                                  | no                                  | no                                  | no                                  |
| S              | D78            | QTNSPRRAR         | no                                  | no                                  | no                                  | no                                  | no                                  |
| S              | D79            | NVYADSFVIR        | NVYADSFV <del>V</del> K             | no                                  | no                                  | no                                  | no                                  |
| S              | D80            | YYVGYLQPR         | no                                  | no                                  | no                                  | no                                  | no                                  |
| S              | D81            | GIYQTSNFR         | GIYQTSNFR                           | no                                  | no                                  | no                                  | no                                  |
| S              | D82            | NGVGYQPYPYR       | <del>T</del> GIGYQPYPYR             | no                                  | no                                  | no                                  | no                                  |
| RdRp           | R4             | AMRNAGIVGV        | AMR <del>D</del> AGIVGV             | no                                  | no                                  | no                                  | no                                  |
| RdRp           | R5             | SLAIDAYPL         | SLAIDAYPL                           | SLAIDAYPL                           | SLAIDAYPL                           | SLAIDAYPL                           | SLAIDAYPL                           |
| RdRp           | R6             | NLLKDCPAV         | NL <del>V</del> KDCPAV              | no                                  | no                                  | no                                  | NLLK <del>G</del> CNAV              |
| RdRp           | R8             | FVNEFYAYL         | FV <del>D</del> E <del>F</del> YAYL | no                                  | no                                  | no                                  | no                                  |
| RdRp           | R9             | ILHCANFNV         | ILHCANFNV                           | <del>I</del> H <del>C</del> ANFNI   | no                                  | <del>I</del> H <del>C</del> ANFNI   | ILHCSNFNT                           |
| RdRp           | R10            | KIFVDGVPFV        | KIFVDGVPFV                          | <del>Q</del> IFVDGVPFV              | no                                  | <del>Q</del> IFVDGVPFV              | no                                  |
| RdRp           | R11            | VMCGGSLYV         | VMCGGSLYV                           | VMCGG <del>C</del> YYV              | no                                  | VMCGG <del>C</del> YYV              | no                                  |
| RdRp           | R12            | MLDMYSVML         | MLDMYSVML                           | no                                  | no                                  | no                                  | no                                  |
| RdRp           | R13            | NMLRIMASL         | NMLRIMASL                           | no                                  | no                                  | no                                  | no                                  |
| RdRp           | R14            | RLANECAQV         | RLANECAQV                           | RLANECAQV                           | <del>R</del> L <del>G</del> NELAQV  | RLANECAQV                           | <del>R</del> L <del>S</del> NELAQV  |
| RdRp           | R15            | QLLFVVEVV         | QLLFVVEVV                           | QLLFV <del>L</del> EVV              | no                                  | QLLFV <del>L</del> EVV              | no                                  |
| RdRp           | R17            | YLPYPDPSRI        | YLPYPDPSRI                          | YLPYP <del>N</del> PSRI             | YLPYPDPSRI                          | YLPYPDPSRI                          | YLPYPDPSRI                          |
| RdRp           | R23            | LSFKELLVYA        | LSFKELLVYA                          | no                                  | no                                  | no                                  | no                                  |
| RdRp           | R24            | MLKTVYSDV         | MLKTVYSDV                           | no                                  | no                                  | no                                  | no                                  |
| RdRp           | R30            | ASGNLLLDK         | ASGNLLLDK                           | no                                  | no                                  | no                                  | no                                  |
| RdRp           | R32            | KSAGFPFNK         | KSAGFPFNK                           | KSAG <del>Y</del> PFNK              | KSAG <del>W</del> PLNK              | KSAG <del>Y</del> PFNK              | KSAG <del>W</del> PLNK              |
| RdRp           | R34            | MTNRQFHQK         | MTNRQFHQK                           | MT <del>G</del> R <del>M</del> FHQK | MT <del>T</del> R <del>Q</del> YHQK | MT <del>G</del> R <del>M</del> FHQK | MT <del>T</del> R <del>Q</del> FHQK |
| RdRp           | R35            | AVAKHDFFK         | AVA <del>V</del> HDFFK              | no                                  | no                                  | no                                  | AVAKHDF <del>F</del> T              |
| RdRp           | R38            | VVSTGYHFR         | VVSTGYHFR                           | no                                  | no                                  | no                                  | no                                  |
| RdRp           | R39            | TVKPGNFNK         | TVKPGNFNK                           | TVKPGNFN <del>Q</del>               | no                                  | TVKPGNFN <del>Q</del>               | TVKPGHFNK                           |
| RdRp           | R40            | KTNCCRFQEK        | KTNCCRFQEK                          | no                                  | no                                  | no                                  | no                                  |
| RdRp           | R41            | AISDYDYR          | AISDYDYR                            | no                                  | no                                  | no                                  | AIK <del>D</del> F <del>F</del> YR  |
| RdRp           | R42            | CSQHTMLVK         | CSQHTMLVK                           | CSQHTMLVK                           | no                                  | CSQHTMLVK                           | no                                  |
| RdRp           | R43            | CSLSHRFYR         | <del>C</del> NLSHRFYR               | CSQ <del>S</del> DRFYR              | no                                  | no                                  | no                                  |
| RdRp           | R44            | GTSTDVVYR         | GTSTDVVYR                           | no                                  | no                                  | no                                  | no                                  |
| RdRp           | R47            | SYSSLMPY          | SYSSLMPY                            | no                                  | SYSS <del>Y</del> MMPY              | no                                  | no                                  |
| RdRp           | R48            | SYFVVKRHTF        | SYFVVKRHT <del>F</del> M            | no                                  | no                                  | no                                  | no                                  |
| Total          |                | 120               | 110                                 | 15                                  | 6                                   | 14                                  | 12                                  |
| <b>Protein</b> | <b>Epitope</b> | <b>SARS-CoV-2</b> | <b>B.1.1.7</b>                      | <b>B.1.351</b>                      | <b>P.1</b>                          | <b>B.1.617</b>                      | <b>Denmark variant</b>              |
| S              | D50            | GVYYHKNNK         | GV <del>Y</del> HKNNK               | no                                  | no                                  | no                                  | no                                  |

|                |                |                   |                              |                              |                              |                    |                    |
|----------------|----------------|-------------------|------------------------------|------------------------------|------------------------------|--------------------|--------------------|
| S              | D53            | NYNYLYRLF         | no                           | no                           | no                           | no                 | NYNYL <b>F</b> RLF |
| S              | D78            | no                | no                           | no                           | no                           | QTNS <b>R</b> RRAR | no                 |
| S              | D82            | NGVGYQPYPYR       | <b>Y</b> G <b>V</b> GYQPYPYR | <b>Y</b> G <b>V</b> GYQPYPYR | <b>Y</b> G <b>V</b> GYQPYPYR | no                 | no                 |
|                |                |                   |                              |                              |                              |                    |                    |
| <b>Protein</b> | <b>Epitope</b> | <b>SARS-CoV-2</b> | <b>B.1.617.2 (Delta)</b>     | <b>C.37 (Lambda)</b>         |                              |                    |                    |
| S              | D50            | GVYYHKNNK         | <b>D</b> VYYHKNNK            | no                           |                              |                    |                    |
| S              | D53            | NYNYLYRLF         | NYNY <b>R</b> YRLF           | NYNY <b>Q</b> YRLF           |                              |                    |                    |
| S              | D78            | QTNSPRRAR         | QTNS <b>R</b> RRAR           | no                           |                              |                    |                    |

Note: “no” means there is no consensus epitope with 0-2 amino acids deviation in the SARS-CoV, indicated HCoV or SARS-CoV-2 variants.

Table S3: 31 validated epitope peptides restricted by HLA-A0201 molecule

| Epitope | Sequence   | Predicted HLA-A restriction  | Affinity with HLA-A0201 IEDB<500nM ANN (nM) | DC-peptide-PBL co-cultures |                | Peptide competitive binding assay (affinity) |       |       |       | T2 binding assay (affinity) |
|---------|------------|------------------------------|---------------------------------------------|----------------------------|----------------|----------------------------------------------|-------|-------|-------|-----------------------------|
|         |            |                              |                                             | method                     | enhance (fold) | A0201                                        | A0203 | A0206 | A0207 | A0201                       |
| A1      | FLAFVVFL   | A0201, A0207<br>A0206, A2402 | 5.26                                        | IFN- $\gamma$              | 2.300          | no                                           | ns    | ns    | inter | inter                       |
| A3      | VLLFLAFVV  | A0201, A0203<br>A1101, A1102 | 21.72                                       | IFN- $\gamma$              | 4.142          | no                                           | ns    | ns    | ns    | low                         |
| A4      | FLLVTLAIL  | A0201, A0207<br>A0203        | 39.95                                       | IFN- $\gamma$              | 5.366          | no                                           | no    | ns    | low   | inter                       |
| A5      | RLCAYCCNIV | A0201, A0203                 | 145.67                                      | IFN- $\gamma$              | 8.288          | no                                           | no    | ns    | ns    | high                        |
| B1      | GLMWLSYFI  | A0201, A0206<br>A0203        | 3.87                                        | IFN- $\gamma$              | 4.980          | high                                         | inter | inter | ns    | high                        |
| B2      | KLLEQWNLV  | A0201, A0206<br>A0203, A0207 | 7.57                                        | IFN- $\gamma$              | 2.281          | inter                                        | high  | inter | high  | inter                       |
| B3      | FVLAADVRI  | A0201, A0207<br>A0206        | 16.52                                       | IFN- $\gamma$              | 5.073          | high                                         | ns    | inter | high  | high                        |
| B4      | FLFLTWICLL | A0201, A0206                 | 10.42                                       | IFN- $\gamma$              | 3.166          | no                                           | ns    | no    | ns    | inter                       |
| B6      | TLACFVLAHV | A0201, A0207<br>A0203        | 20.28                                       | IFN- $\gamma$              | 3.421          | inter                                        | low   | ns    | high  | high                        |
| C1      | LLDRLNQL   | A0201, A0206<br>A0203        | 14.81                                       | CFSE                       | 1.300          | no                                           | inter | no    | ns    | high                        |
| C2      | GMSRIGMEV  | A0201                        | reported                                    | ns                         | ns             | ns                                           | ns    | ns    | ns    | no                          |
| C3      | WLTGTGAIKL | A0201, A0206<br>A0203        | 284.75                                      | IFN- $\gamma$              | 3.709          | no                                           | no    | no    | ns    | low                         |
| D2      | FIAGLIAIV  | A0201, A0206<br>A0203        | 10.29                                       | IFN- $\gamma$              | 2.223          | inter                                        | high  | inter | ns    | high                        |
| D5      | KLNDLCFTNV | A0201, A0207<br>A0203        | 15.27                                       | IFN- $\gamma$              | 5.792          | low                                          | high  | ns    | low   | high                        |
| D6      | RLDKVEAEV  | A0201, A0207                 | 38.95                                       | IFN- $\gamma$              | 2.069          | no                                           | ns    | ns    | low   | high                        |
| D7      | VLNDILSRL  | A0201                        | reported                                    | ns                         | ns             | ns                                           | ns    | ns    | ns    | inter                       |
| D11     | VVFLHVTYV  | A0201                        | reported                                    | ns                         | ns             | ns                                           | ns    | ns    | ns    | high                        |
| D12     | FVFLVLLPLV | A0201, A0207<br>A0206        | 32.64                                       | CFSE                       | 1.234          | low                                          | ns    | no    | no    | low                         |
| D13     | MIAQYTSAL  | A0201, A0203                 | 41.52                                       | IFN- $\gamma$              | 11.013         | no                                           | inter | ns    | ns    | no                          |
| R3      | LMIERFVSL  | A0201                        | reported                                    | ns                         | ns             | ns                                           | ns    | ns    | ns    | high                        |
| R4      | AMRNAGIVGV | A0201                        | 78.14                                       | IFN- $\gamma$              | 2.078          | inter                                        | ns    | ns    | ns    | high                        |
| R5      | SLAIDAYPL  | A0201, A0203                 | 20.82                                       | IFN- $\gamma$              | 2.175          | high                                         | high  | ns    | ns    | high                        |
| R6      | NLLKDCPAV  | A0201, A0207<br>A0206, A0203 | 18.8                                        | CFSE                       | 1.493          | no                                           | no    | no    | low   | high                        |
| R8      | FVNEFYAYL  | A0201                        | 8.24                                        | IFN- $\gamma$              | 2.132          | high                                         | ns    | ns    | ns    | high                        |
| R9      | ILHCANFNV  | A0201, A0206<br>A0203        | 8.64                                        | IFN- $\gamma$              | 2.070          | high                                         | high  | inter | ns    | high                        |
| R10     | KIFVDGVPFV | A0201                        | 10.65                                       | IFN- $\gamma$              | 2.043          | high                                         | ns    | ns    | ns    | inter                       |
| R11     | VMCGGSLYV  | A0201                        | 14.27                                       | IFN- $\gamma$              | 3.036          | inter                                        | ns    | ns    | ns    | high                        |
| R12     | MLDMYSVML  | A0201                        | 15.97                                       | IFN- $\gamma$              | 2.886          | high                                         | ns    | ns    | ns    | inter                       |
| R13     | NMLRIMASL  | A0201                        | 41.52                                       | IFN- $\gamma$              | 2.470          | no                                           | ns    | ns    | ns    | low                         |
| R14     | RLANCAQV   | A0201, A0203                 | 52.91                                       | IFN- $\gamma$              | 2.333          | no                                           | inter | ns    | ns    | high                        |
| R15     | QLLFVVEVV  | A0201                        | 163.5                                       | IFN- $\gamma$              | 3.184          | high                                         | ns    | ns    | ns    | high                        |

Note 1: **IFN- $\gamma$** : After DC-peptide-PBLs co-cultures, the frequency of IFN- $\gamma$ <sup>+</sup>/CD8<sup>+</sup> T cells in CD3<sup>+</sup>/CD8<sup>+</sup> cell population was analyzed by flow cytometry. **CFSE**: After DC-peptide-CFSE-prelabeled PBLs co-cultures, the proliferation percentage of CD8<sup>+</sup> T cells in CD3<sup>+</sup>/CD8<sup>+</sup> population was analyzed according to the reduction of CFSE-staining brightness. **Enhance (fold)**: The folds of frequency of IFN- $\gamma$ <sup>+</sup>/CD8<sup>+</sup> T cells or proliferation percentage of CD8<sup>+</sup> T cells in the DC-peptide-PBL co-culture wells when compared with

that in the DC-PBL co-culture well without peptide. **ns**: no test. Reported: the epitope has been reported previously.

Note 2: Named epitopes beginning with A, B, C, D and R was derived from E, M, N, S and RdRp protein, respectively.

Table S4: Affinity of 31 validated epitope peptides with HLA-A0201 molecules on T2 cells

| Protein | Peptide | High affinity<br>(FI>1) | Intermediate affinity<br>(0.5<FI≤1) | Low affinity<br>(0.3≤FI≤0.5) | No affinity<br>FI < 0.3 | FI   |  |
|---------|---------|-------------------------|-------------------------------------|------------------------------|-------------------------|------|--|
| E       | A1      |                         | inter                               |                              |                         | 0.65 |  |
|         | A3      |                         |                                     | low                          |                         | 0.39 |  |
|         | A4      |                         | inter                               |                              |                         | 0.82 |  |
|         | A5      | high                    |                                     |                              |                         | 1.65 |  |
|         | B1      | high                    |                                     |                              |                         | 2.28 |  |
| M       | B2      |                         | inter                               |                              |                         | 0.94 |  |
|         | B3      | high                    |                                     |                              |                         | 3.34 |  |
|         | B4      |                         | inter                               |                              |                         | 0.51 |  |
|         | B6      | high                    |                                     |                              |                         | 1.73 |  |
| N       | C1      | high                    |                                     |                              |                         | 1.26 |  |
|         | C2      |                         |                                     |                              | no                      | 0.21 |  |
|         | C3      |                         |                                     | low                          |                         | 0.43 |  |
| S       | D2      | high                    |                                     |                              |                         | 1.12 |  |
|         | D5      | high                    |                                     |                              |                         | 2.59 |  |
|         | D6      | high                    |                                     |                              |                         | 3.65 |  |
|         | D7      |                         | inter                               |                              |                         | 0.89 |  |
|         | D11     | high                    |                                     |                              |                         | 2.11 |  |
|         | D12     |                         |                                     |                              | low                     | 0.35 |  |
|         | D13     |                         |                                     |                              | no                      | 0.24 |  |
| RdRp    | R3      | high                    |                                     |                              |                         | 2.91 |  |
|         | R4      | high                    |                                     |                              |                         | 1.98 |  |
|         | R5      | high                    |                                     |                              |                         | 4.00 |  |
|         | R6      | high                    |                                     |                              |                         | 2.48 |  |
|         | R8      | high                    |                                     |                              |                         | 2.11 |  |
|         | R9      | high                    |                                     |                              |                         | 3.65 |  |
|         | R10     |                         | inter                               |                              |                         | 0.58 |  |
|         | R11     | high                    |                                     |                              |                         | 1.95 |  |
|         | R12     |                         | inter                               |                              |                         | 0.79 |  |
|         | R13     |                         |                                     |                              | low                     | 0.41 |  |
|         | R14     | high                    |                                     |                              |                         | 2.21 |  |
|         | R15     | high                    |                                     |                              |                         | 3.67 |  |
|         | Total   | 31                      | 18                                  | 7                            | 4                       | 2    |  |

Note: The fluorescence index (FI) was calculated as follows:  $FI = (\text{mean PE fluorescence with the given peptide} - \text{mean PE fluorescence without peptide}) / (\text{mean PE without peptide})$ .  $FI > 0.5$  was the criteria of peptides with affinity while peptides with  $FI > 1$  were regarded as high-affinity epitopes;  $0.3 \leq FI \leq 0.5$  means low affinity while  $FI < 0.3$  means no binding.

Table S5: 31 epitope peptides were grouped into several pools for vaccine generation and specific T cell detection.

|                        |         |                                                 |
|------------------------|---------|-------------------------------------------------|
| For vaccine generation | pool-v1 | A1+A3+A4+A5+B1+B2+B3+B4                         |
|                        | pool-v2 | B6+C1+C2+C3+D2+D5+D6+D7                         |
|                        | pool-v3 | D11+D12+D13+R3+R4+R5+R6+R8                      |
|                        | pool-v4 | R9+R10+R11+R12+R13+R14+R15                      |
| For ELISPOT assay      | pool-s1 | A1+A3+A4+A5                                     |
|                        | pool-s2 | B1+B2+ B4+B6                                    |
|                        | pool-s3 | B3                                              |
|                        | pool-s4 | C1+C2+C3                                        |
|                        | pool-s5 | D2+D5+D6+D7+ D12+D13                            |
|                        | pool-s6 | D11                                             |
|                        | pool-s7 | R5+R6+R8+R11+R12+R14+R15                        |
|                        | pool-s8 | R3+R4+R9+R10+R13                                |
| For ICS and ELISA      | pool-c1 | A1+A3+A4+A5                                     |
|                        | Pool-c2 | B1+B2+B3+B4+B6                                  |
|                        | pool-c3 | C1+C2+C3                                        |
|                        | pool-c4 | D2+D5+D6+D7+D11+D12+D13                         |
|                        | pool-c5 | R3+ R4+R5+R6+R8+R9+R10+R11+R12<br>+ R13+R14+R15 |

Table S6: Immunization groups, vaccines formula and vaccination scheme

|                                      |                                                                                                                                         |
|--------------------------------------|-----------------------------------------------------------------------------------------------------------------------------------------|
| PLGA-NPs<br>/peptides<br>(Vaccine A) | pool-v1: PLGA-NPs/pool-v1(60mg/240µg) mixed with 75µL Poly I:C and 225µLNS, injected into 3 mice, 100µL/mouse, one injection site/mouse |
|                                      | pool-v2: PLGA-NPs/pool-v2(60mg/240µg) mixed with 75µL Poly I:C and 225µLNS, injected into 3 mice, 100µL/mouse, one injection site/mouse |
|                                      | pool-v3: PLGA-NPs/pool-v3(60mg/240µg) mixed with 75µL Poly I:C and 225µLNS, injected into 3 mice, 100µL/mouse, one injection site/mouse |
|                                      | pool-v4: PLGA-NPs/pool-v4(60mg/210µg) mixed with 75µL Poly I:C and 225µLNS, injected into 3 mice, 100µL/mouse, one injection site/mouse |
| R848<br>/peptides<br>(Vaccine B)     | pool-v1:50µL pool-v1 mixed with 75µL R848 and 175µLNS, injected into 3 mice, 100µL/mouse, one injection site/mouse                      |
|                                      | pool-v2:50µL pool-v2 mixed with 75µL R848 and 175µLNS, injected into 3 mice, 100µL/mouse, one injection site/mouse                      |
|                                      | pool-v3:50µL pool-v3 mixed with 75µL R848 and 175µLNS, injected into 3 mice, 100µL/mouse, one injection site/mouse                      |
|                                      | pool-v4:45µL pool-v4 mixed with 75µL R848 and 180µLNS, injected into 3 mice, 100µL/mouse, one injection site/mouse                      |
| PolyI:C<br>/peptides<br>(Vaccine C)  | pool-v1: 50µL pool-v1mixed with 75µL Poly I: C and 175µLNS, injected into 3 mice, 100µL/mouse, one injection site/mouse                 |
|                                      | pool-v2: 50µL pool-v2mixed with 75µL Poly I: C and 175µLNS, injected into 3 mice, 100µL/mouse, one injection site/mouse                 |
|                                      | pool-v3:50µL pool-v3mixed with 75µL Poly I: C and 175µLNS, injected into 3 mice, 100µL/mouse, one injection site/mouse                  |
|                                      | pool-v4:45µL pool-v4 mixed with 75µL Poly I: C and 180µLNS, injected into 3 mice, 100µL/mouse, one injection site/mouse                 |
| Control group                        | Control mouse 1: 100µL NS/injection site, 4 injection sites                                                                             |
|                                      | Control mouse 2: 80mg empty PLGA-NPs mixed with 400µL NS, 100µL/injection site, 4 injection sites                                       |
|                                      | Control mouse 3: 100µL NS/injection site, 4 injection sites                                                                             |

Table S7 Primers used for HLA-A genotyping

| Primers | Sequence (5'-3')           | Anneal site            | Length |
|---------|----------------------------|------------------------|--------|
| A1      | GAAACSGCCTCTGYGGGGAGAAGCAA | HLA-A intron1:21-26    | 985bp  |
| A3      | TGTTGGTCCCAATTGTCTCCCCTC   | HLA-A intron3:66-89    |        |
| A2F     | AGCCGCGCKGGASGAGGGTC       | Exon2 intron2: 99-119  | 270bp  |
| A2R     | GGCCCGTCCGTGGGGGATGAG      | Exon2 intron2: 37-57   |        |
| A3F     | GTTTCATTTTGRTTKAGGCCA      | Exon3 intron3: 150-171 | 276bp  |
| A3R     | TGTGGGAGGCCAGCCCGGGAGA     | Exon3 intron3: 41-66   |        |

Figure S1:

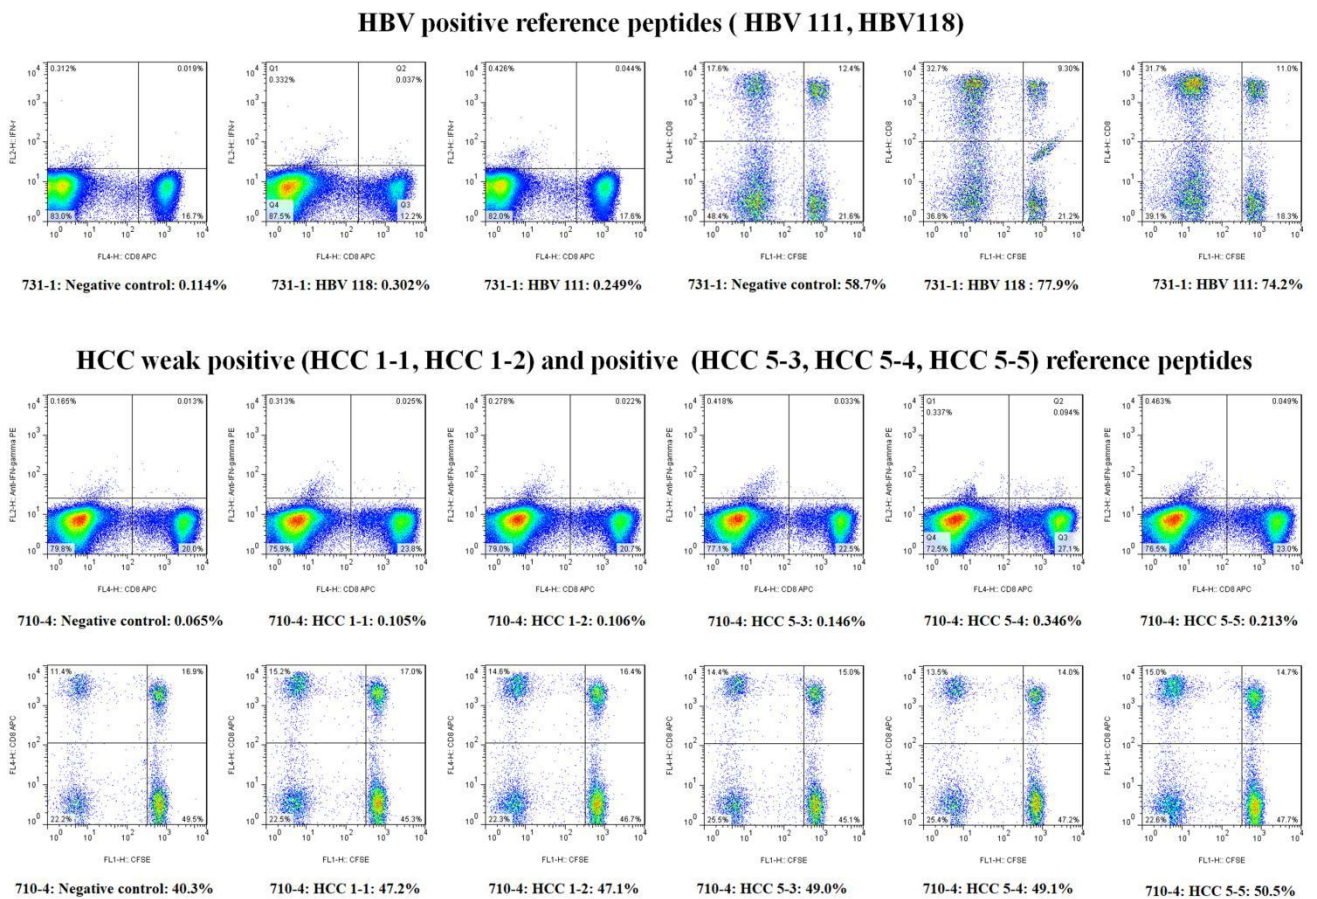

**Figure S1: Reference epitope peptides were tested in the DC-peptide-PBL co-culture system (flow plots). The HLA-A0201 restricted HCC1-1, HCC1-2, HCC5-3, HCC5-4, HCC5-5 peptides, and HLA-A2402 restricted HBV111 and HBV118 peptides were co-cultured with DC and PBLs from healthy donor's PBMCs with matching HLA-A allotype for 14 days. The flow plots of IFN- $\gamma$ <sup>+</sup> T cells and CFSE staining flow plots of CD8<sup>+</sup> T cells**



in CD3<sup>+</sup>/CD8<sup>+</sup> T cell population for each reference epitope peptide and no peptide negative control were presented. For flow plots of IFN- $\gamma$ <sup>+</sup> T cells, the horizontal coordinates label such as “731-1: HBV118: 0.302%” means that the PBMCs from the donor 731-1 were used to test epitope peptide HBV118 in the DC-peptide-PBL co-cultures, and the frequency of IFN- $\gamma$ <sup>+</sup> cells in CD3<sup>+</sup>/CD8<sup>+</sup> T cell populations was 0.302%; label such as “731-1: Negative control: 0.114%” means that the PBMCs from the donor 731-1 were used in the DC-peptide-PBL co-cultures with no peptide, and the frequency of IFN- $\gamma$ <sup>+</sup> cells in CD3<sup>+</sup>/CD8<sup>+</sup> T cell populations was 0.114%. The rest can be deduced from this manner. For flow plots of CFSE staining, the horizontal coordinates label such as “731-1: HBV118: 77.9%” means that the PBMCs from the donor 731-1 were used to test epitope peptide HBV118 in the DC-peptide-PBL co-cultures, and the proliferation percentage of CD8<sup>+</sup> cells in CD3<sup>+</sup>/CD8<sup>+</sup> T cell populations was 77.9%; label such as “731-1: Negative control: 58.7%” means that the PBMCs from the donor 731-1 were used in the DC-peptide-PBL co-cultures with no peptide, and the proliferation percentage of CD8<sup>+</sup> cells in CD3<sup>+</sup>/CD8<sup>+</sup> T cell populations was 58.7%. The rest can be deduced from this manner.

Figure S2:

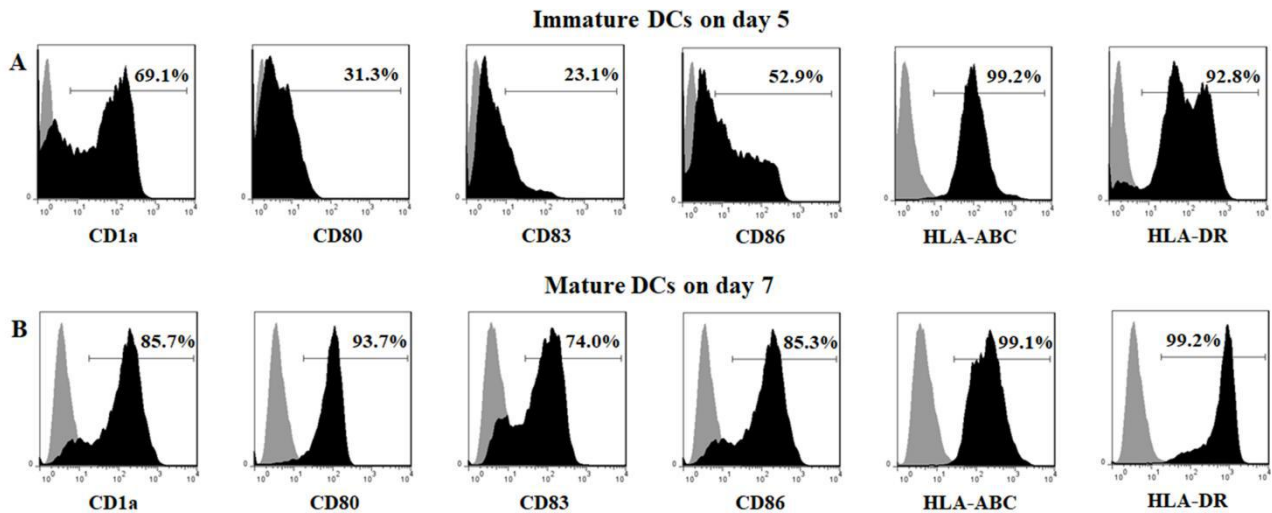

**Figure S2: Generation of mature mDC from adherent monocytes.** PBMCs from healthy donors were seeded into culture flask and the monocytes adhered for 2 hours as described in the Methods section. After washing out the non-adherent cells in both systems, the cells were cultured for 5 days with 1,000 IU/mL GM-CSF and 500 IU/mL IL-4. Then the immature DCs were matured with 1 $\mu$ g/mL LPS for another 48 hours. Immature DCs and mature DCs were stained for CD1a, CD80, CD83, CD86, HLA-ABC and HLA-DR. The unstained and

stained populations in the histograms are shown in grey and black, respectively. **(A)** Phenotype of immature DCs on day 5. **(B)** Phenotype of mature DCs on day 7.

Figure S3:

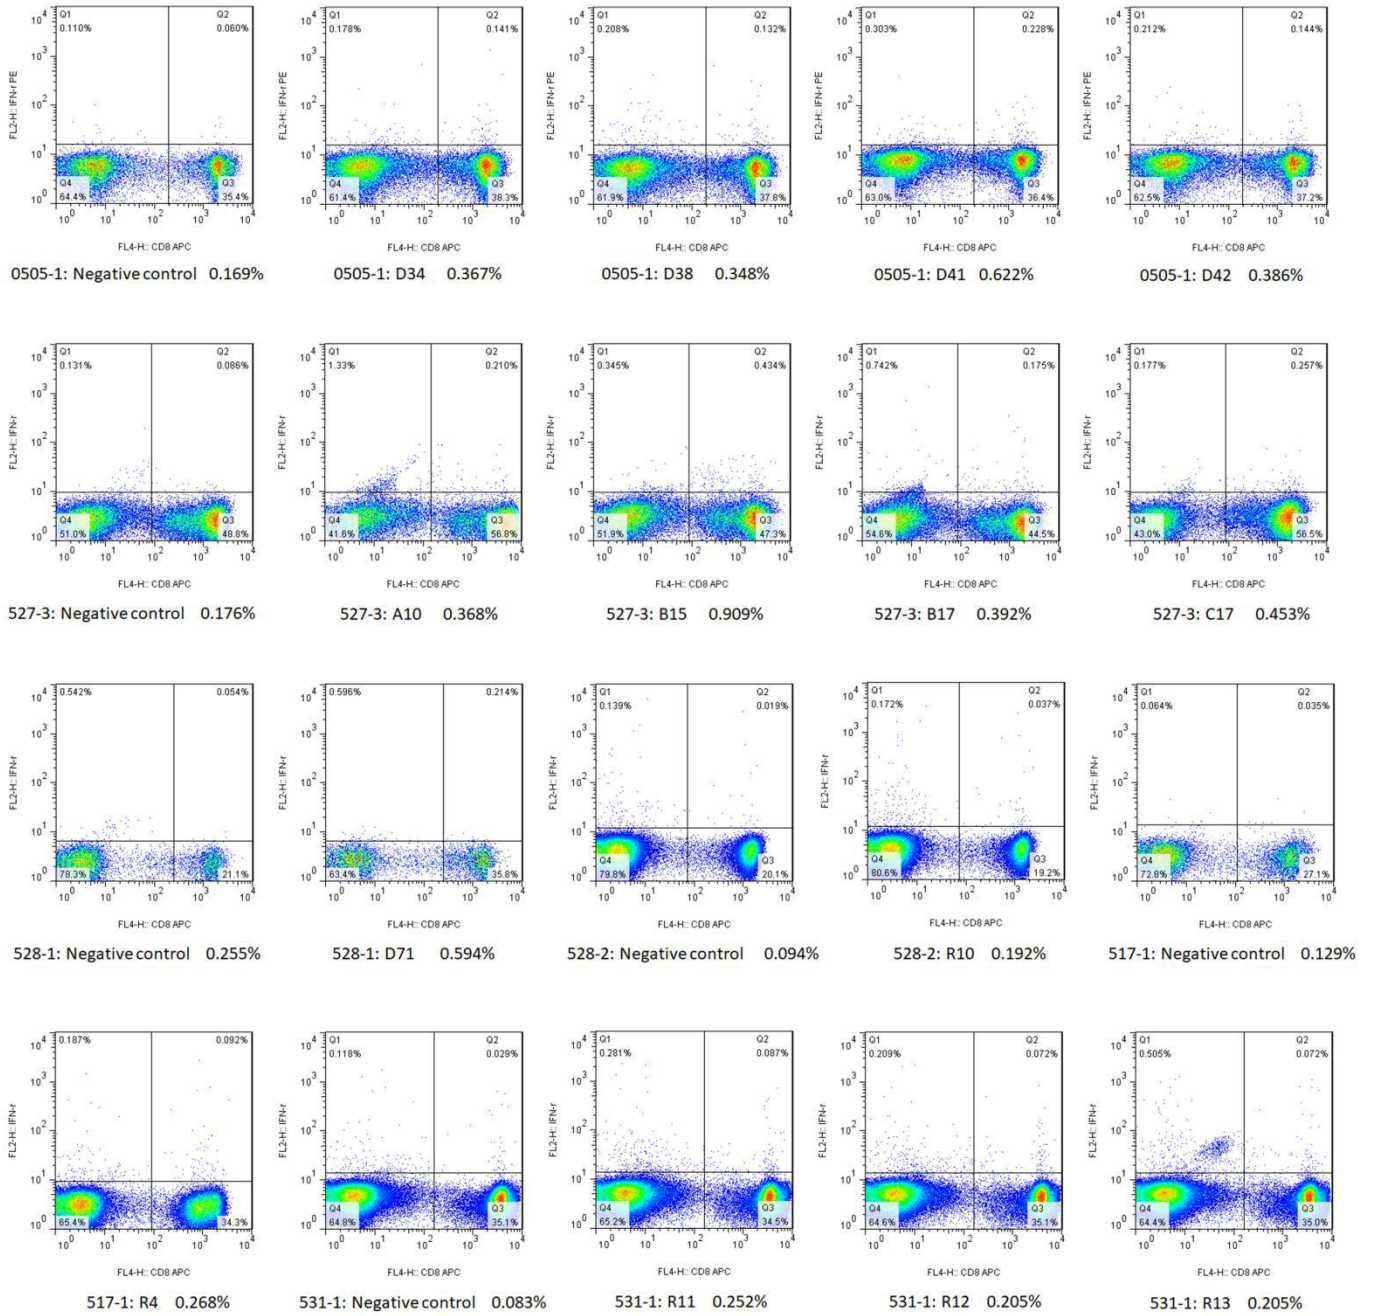

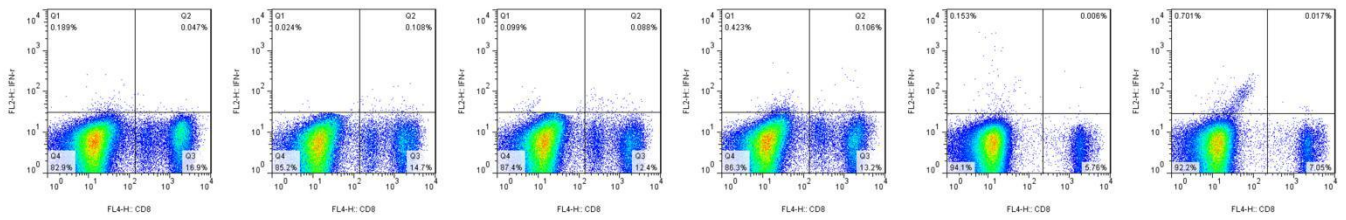

623-1: Negative control 0.277%    623-1: A9 0.729%    623-1: B11 0.705%    623-1: C16 0.797%    623-4: Negative control 0.104%    623-4: A9 0.241%

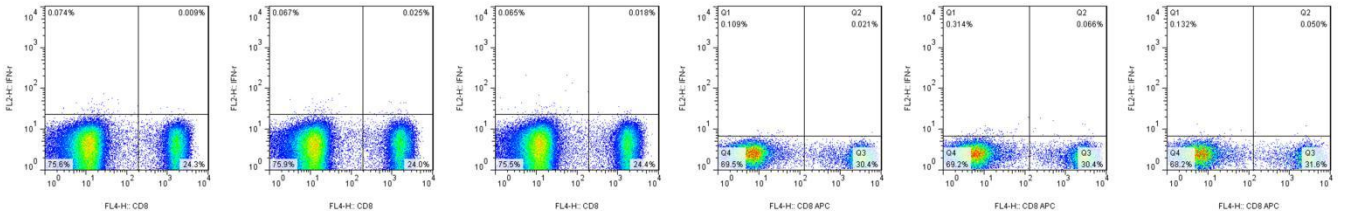

623-3: Negative control 0.037%    623-3: C45 0.104%    623-3: C46 0.074%    701-1: Negative control 0.069%    701-1: B26 0.217%    701-1: B31 0.158%

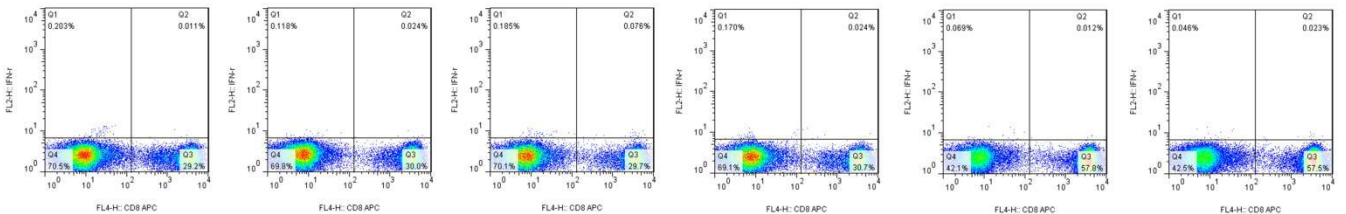

701-2: Negative control 0.037%    701-2: A4 0.080%    701-2: A5 0.255%    701-2: B1 0.078%    701-4: Negative control 0.020%    701-4: D40 0.040%

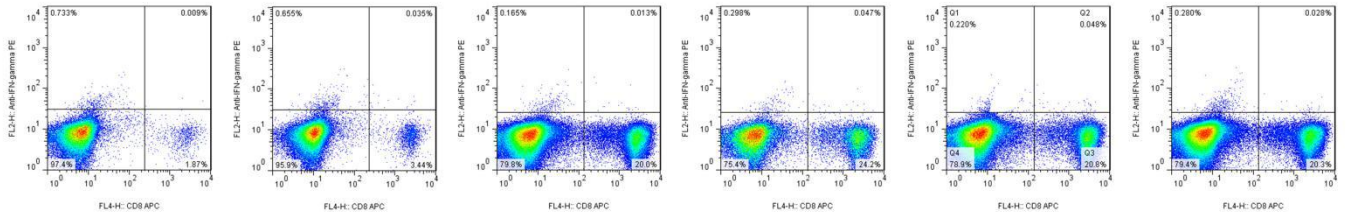

710-2: Negative control 0.479%    710-2: D55 1.007%    710-3: Negative control 0.065%    710-3: A6 0.194%    710-3: A7 0.230%    710-3: D17 0.138%

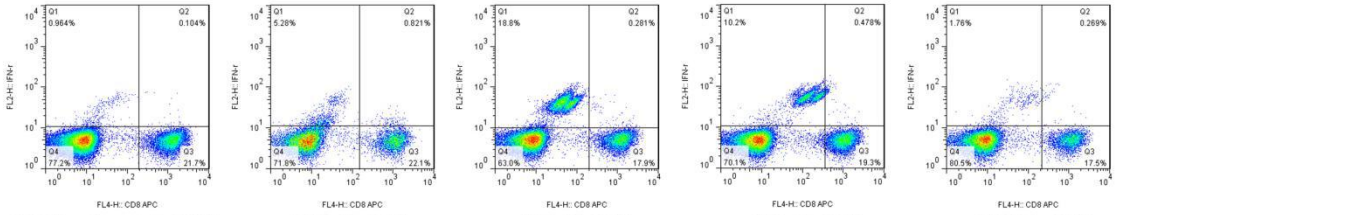

714-2: Negative control 0.477%    714-2: A5 3.58%    714-2: B1 1.54%    714-2: B3 2.42%    714-2: B4 1.51%

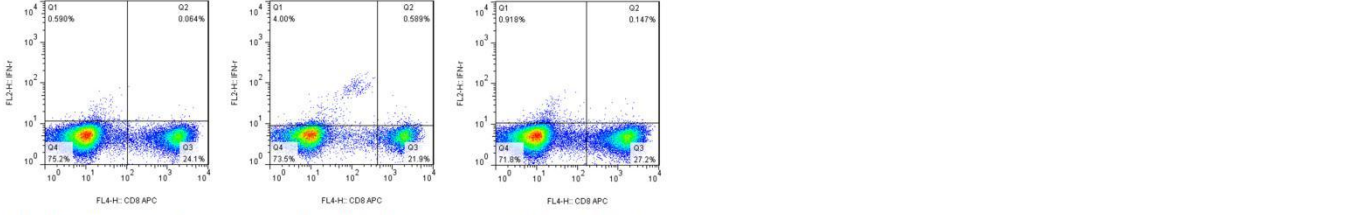

714-3: Negative control 0.265%    714-3: B10 2.62%    714-3: R17 0.538%

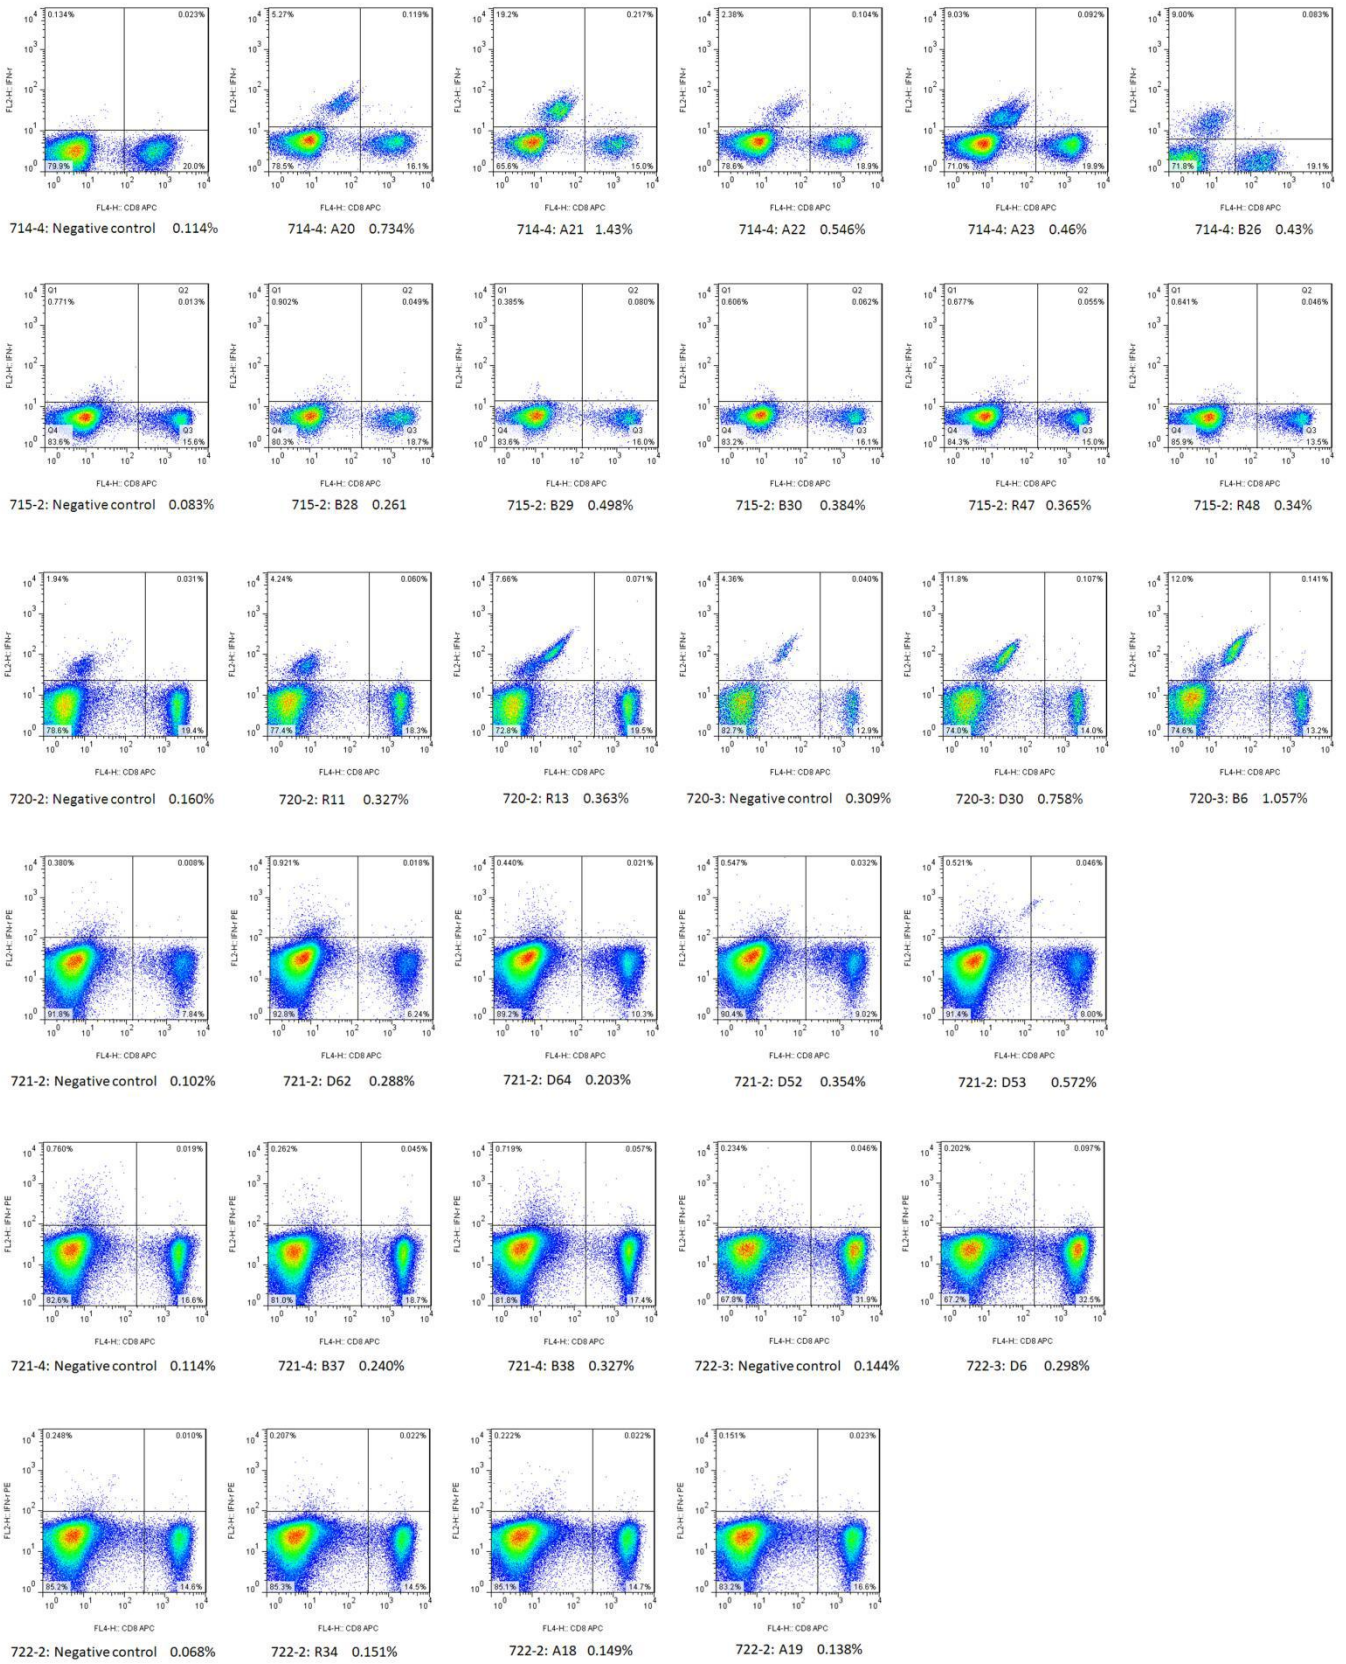

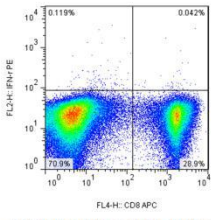

722-4: Negative control 0.145%

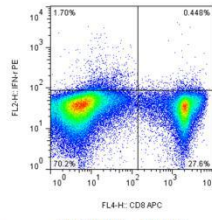

722-4: D13 1.597%

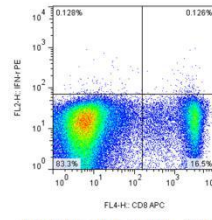

724-2: Negative control 0.566%

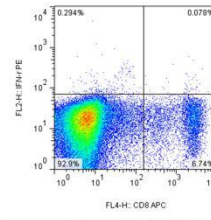

724-2: B34 1.144%

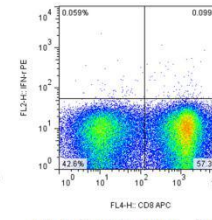

724-4: Negative control 0.172%

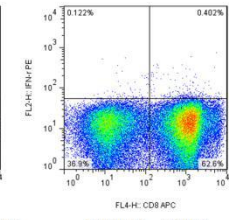

724-4: C3 0.638%

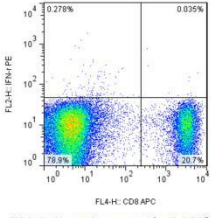

724-3: Negative control 0.169%

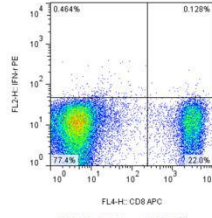

724-3: D50 0.578%

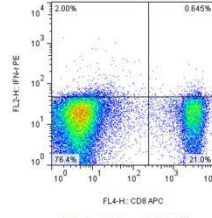

724-3: C49 2.980%

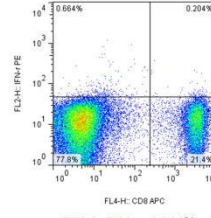

724-3: D46 0.944%

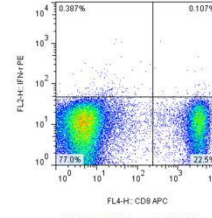

724-3: D47 0.473%

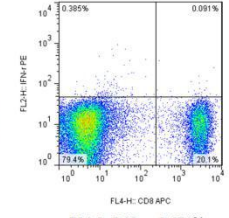

724-3: D48 0.451%

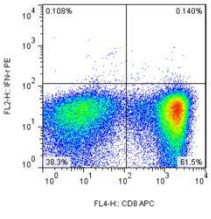

727-1: Negative control 0.227%

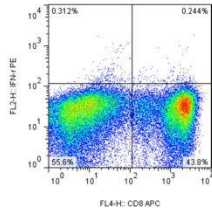

727-1: C35 0.554%

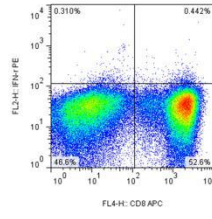

727-1: D56 0.833%

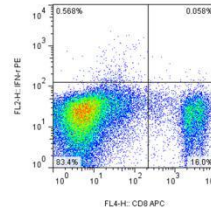

727-3: Negative control 0.361%

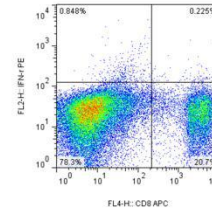

727-3: C47 1.075%

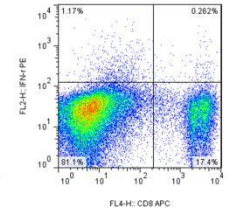

727-3: D76 1.483%

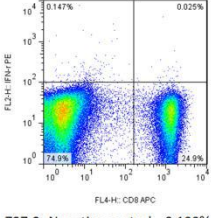

727-2: Negative control 0.100%

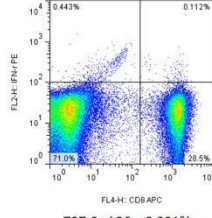

727-2: A26 0.391%

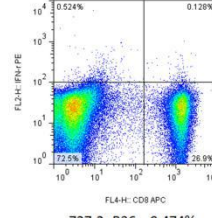

727-2: B36 0.474%

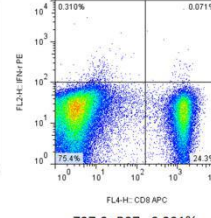

727-2: B37 0.291%

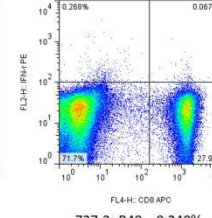

727-2: B40 0.240%

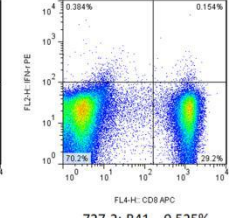

727-2: B41 0.525%

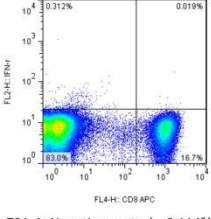

731-4: Negative control 0.114%

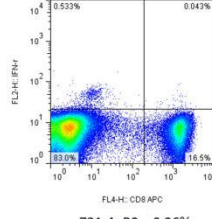

731-4: B2 0.26%

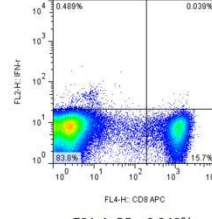

731-4: R5 0.248%

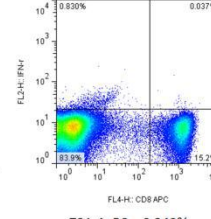

731-4: R8 0.243%

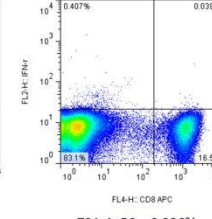

731-4: R9 0.236%

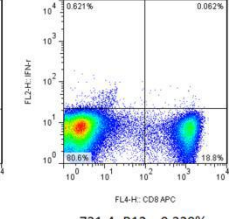

731-4: R12 0.329%

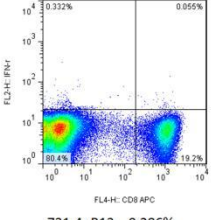

731-4: R13 0.286%

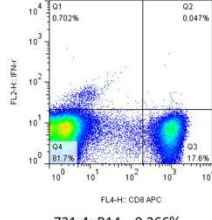

731-4: R14 0.266%

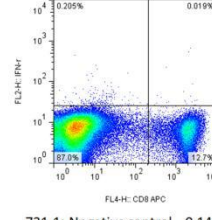

731-1: Negative control 0.149%

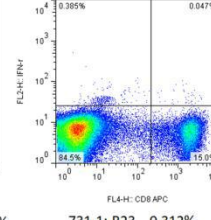

731-1: R23 0.312%

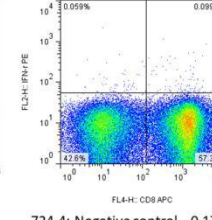

724-4: Negative control 0.172%

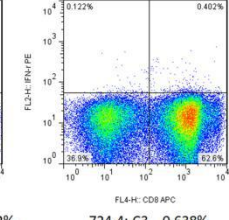

724-4: C3 0.638%

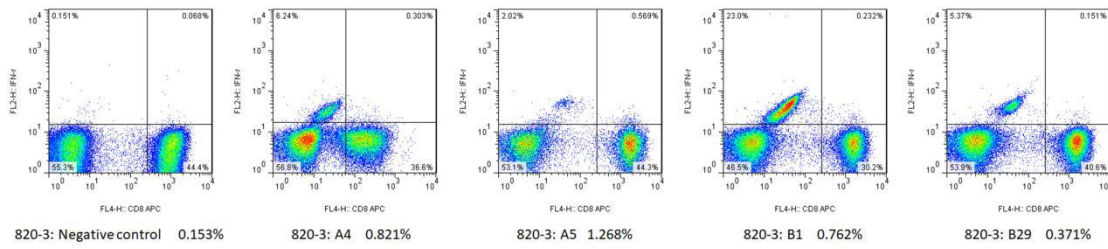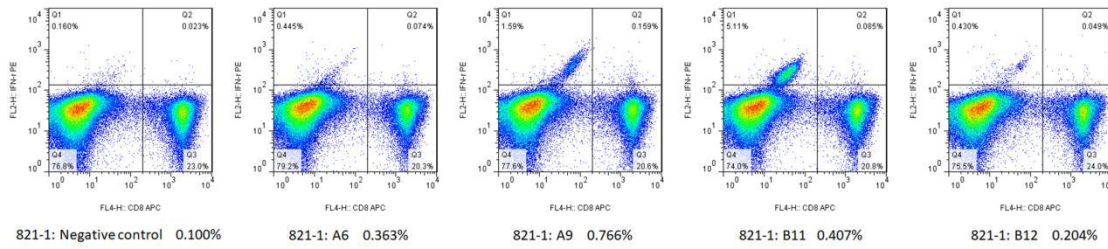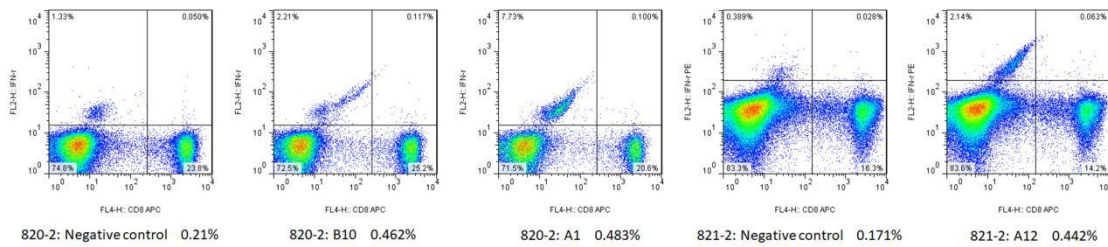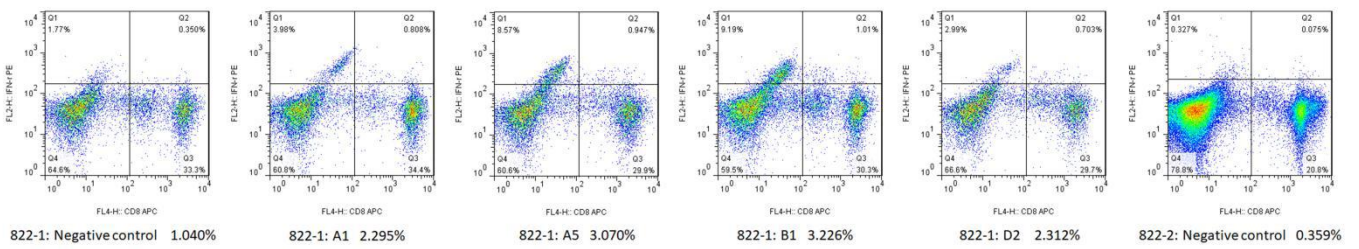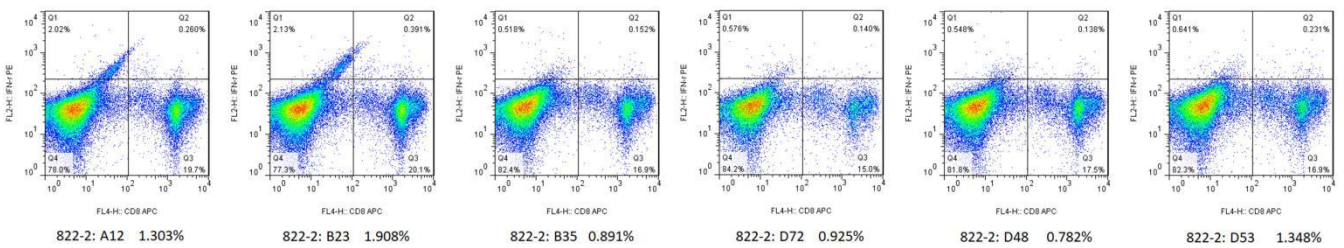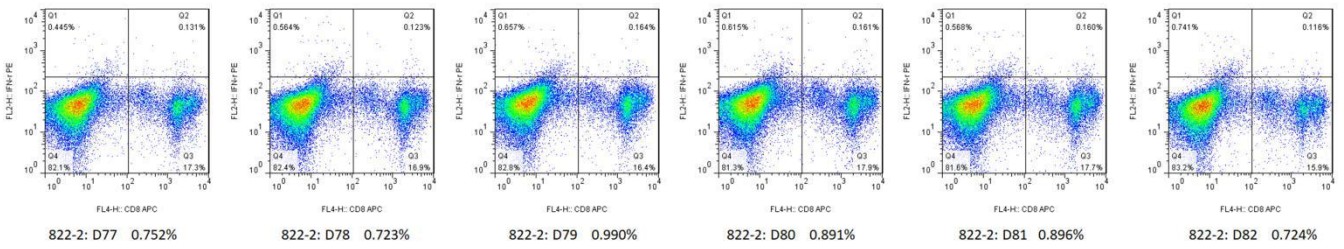

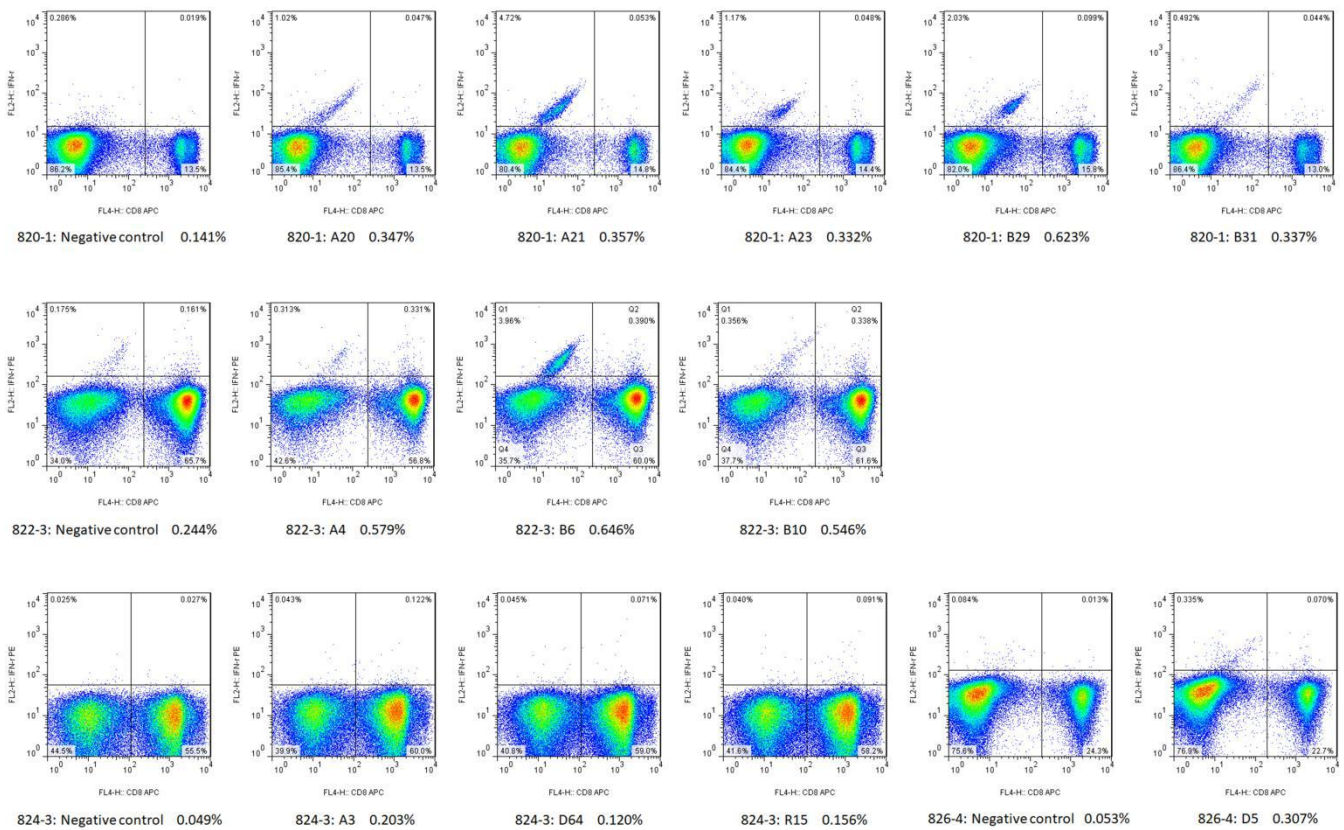

**Figure S3: 120 epitopes were validated by DC-peptide-PBL co-culture experiments (IFN- $\gamma$  ICS flow plots).** DCs were induced for 7 days from healthy donor's PBMCs, then coincubated with candidate epitope peptides and autologous PBLs for 14 days. Cells were harvested and stimulated by corresponding candidate peptides for another 16 hours followed by IFN- $\gamma$  ICS. The presented are flow plots for each positive epitope peptide and each responded donor. The horizontal coordinates label such as "0505-1: D34 0.367%" means that the PBMCs from the donor 0505-1 were used to test epitope peptide D34 in the DC-peptide-PBL co-cultures, and the frequency of IFN- $\gamma$ <sup>+</sup> cells in CD3<sup>+</sup>/CD8<sup>+</sup> T cell populations was 0.367%; label such as "0505-1: negative control 0.169%" means that the PBMCs from the donor 0505-1 were used in the DC-peptide-PBL co-cultures with no peptide, and the frequency of IFN- $\gamma$ <sup>+</sup> cells in CD3<sup>+</sup>/CD8<sup>+</sup> T cell populations was 0.169%. The rest can be deduced from this manner.

Figure S4:

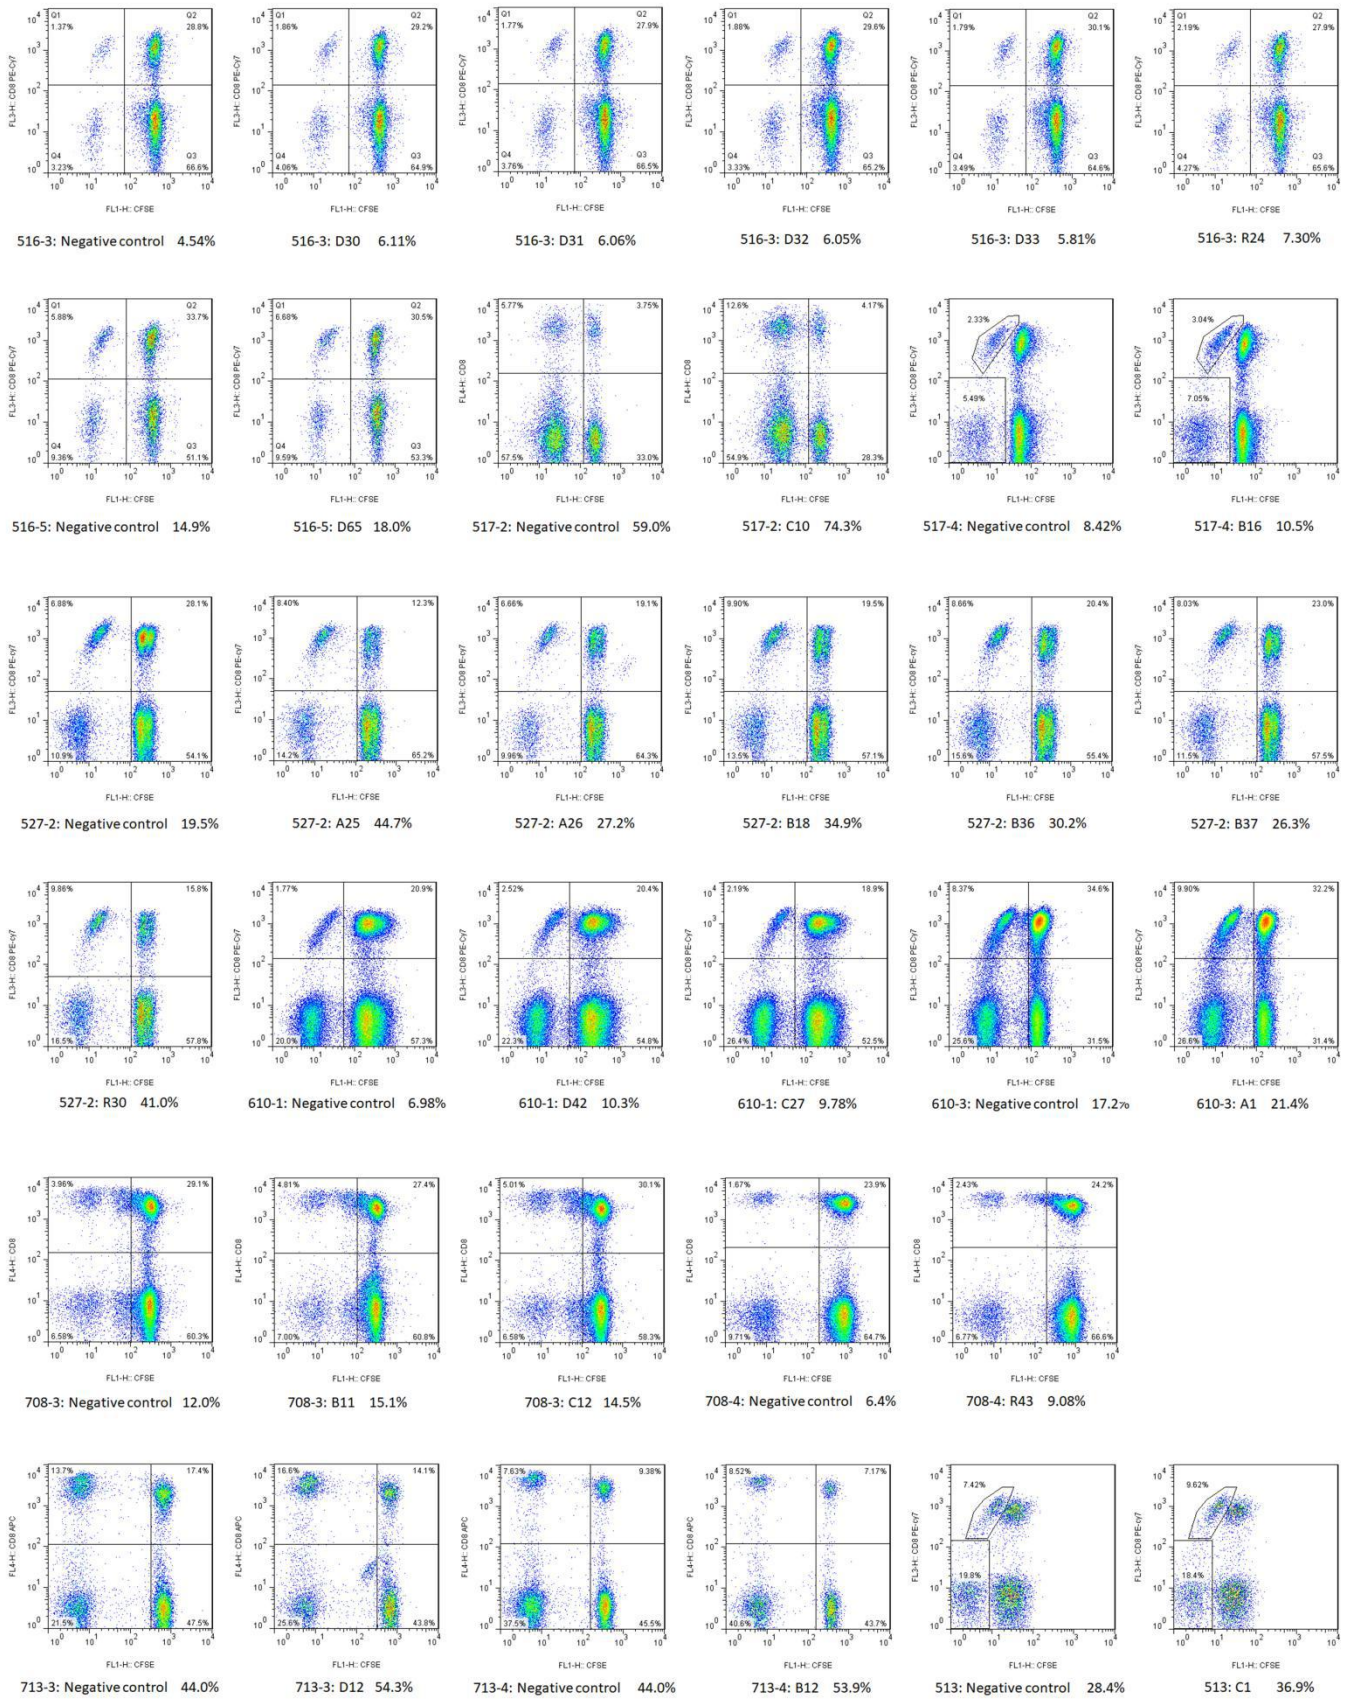



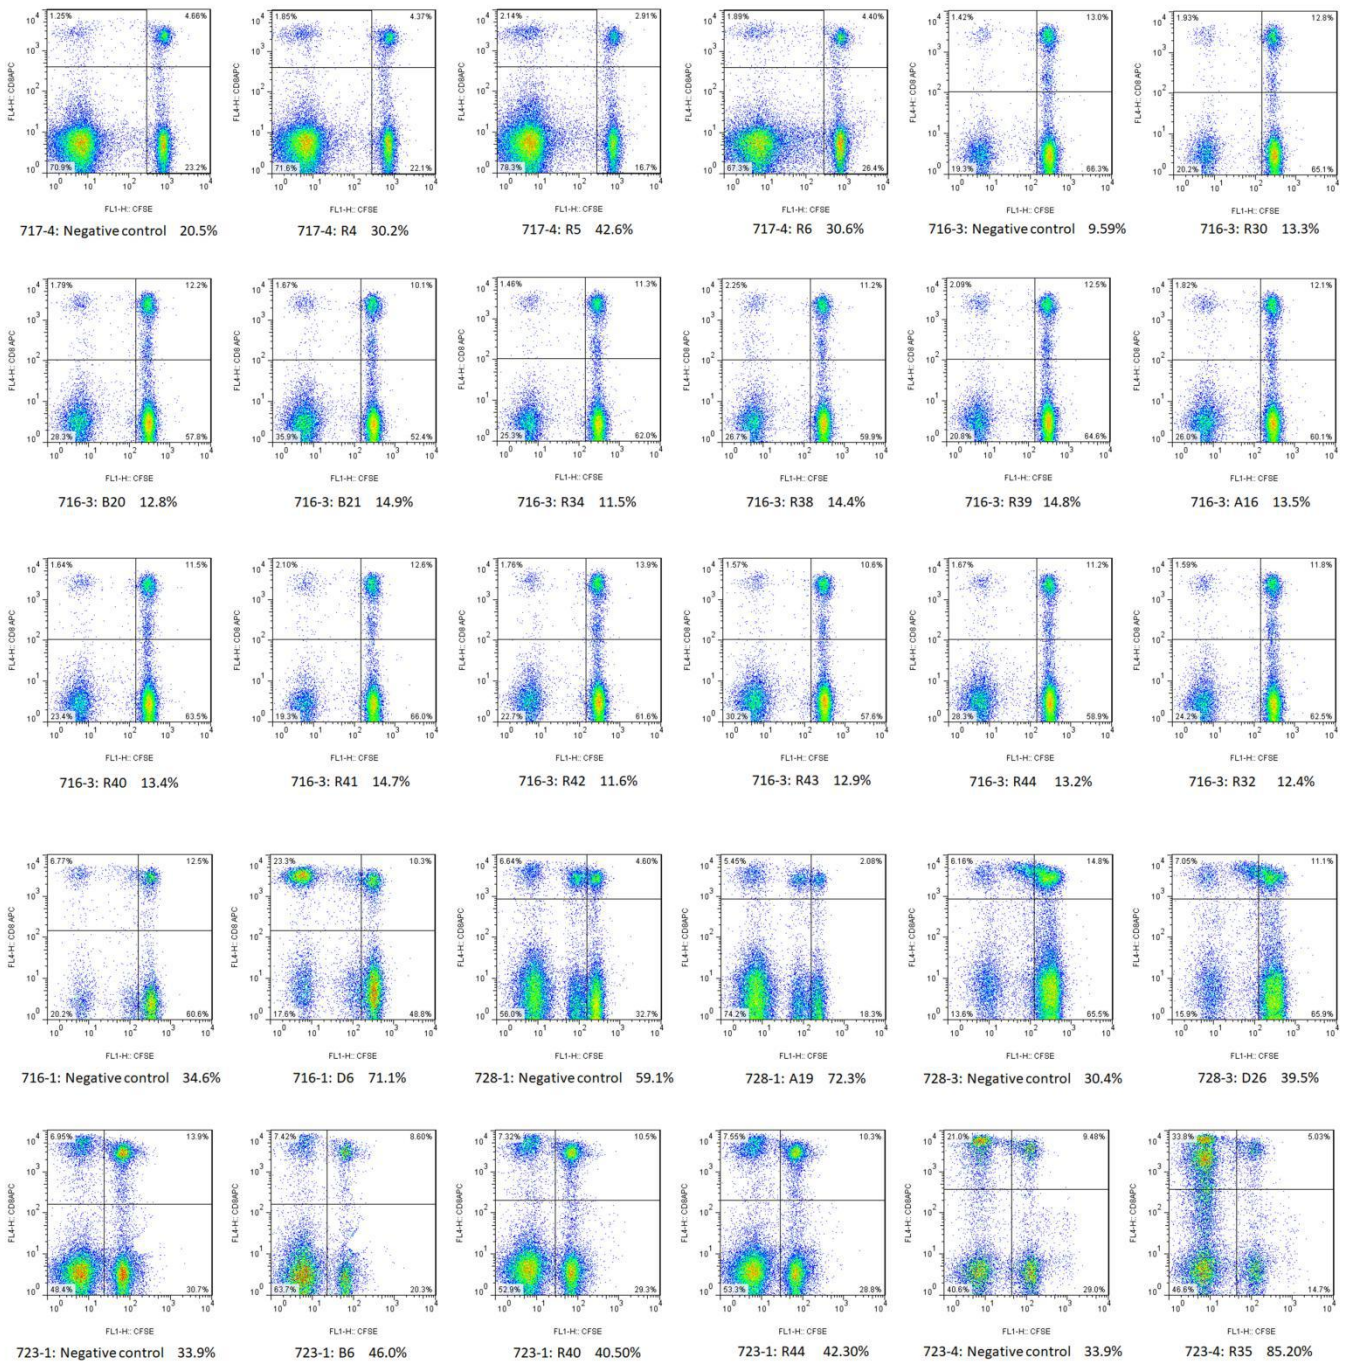

**Figure S4: 120 candidate epitopes were validated by DC-peptide-PBL co-culture experiments (CFSE staining flow plots).** DCs were coincubated with candidate epitope peptides and CFSE-prelabeled PBLs for 14 days. Cells were then analyzed by flow cytometry. The presented are flow plots for each positive epitope peptide and each responded donor. The horizontal coordinates label such as “516-3: D30 6.11%” means that the PBMCs from the donor 516-3 were used to test epitope peptide D30 in the DC-peptide-PBL co-cultures, and the proliferation percentage of CD8<sup>+</sup> cells in CD3<sup>+</sup>/CD8<sup>+</sup> T cell populations was 6.11%; label such as “516-3: negative control 4.54%” means that the PBMCs from the donor 516-3 were used in the DC-peptide-PBL co-cultures with no peptide, and the

proliferation percentage of CD8<sup>+</sup> cells in CD3<sup>+</sup>/CD8<sup>+</sup> T cell populations was 4.54%. The rest can be deduced from this manner.

Figure S5:

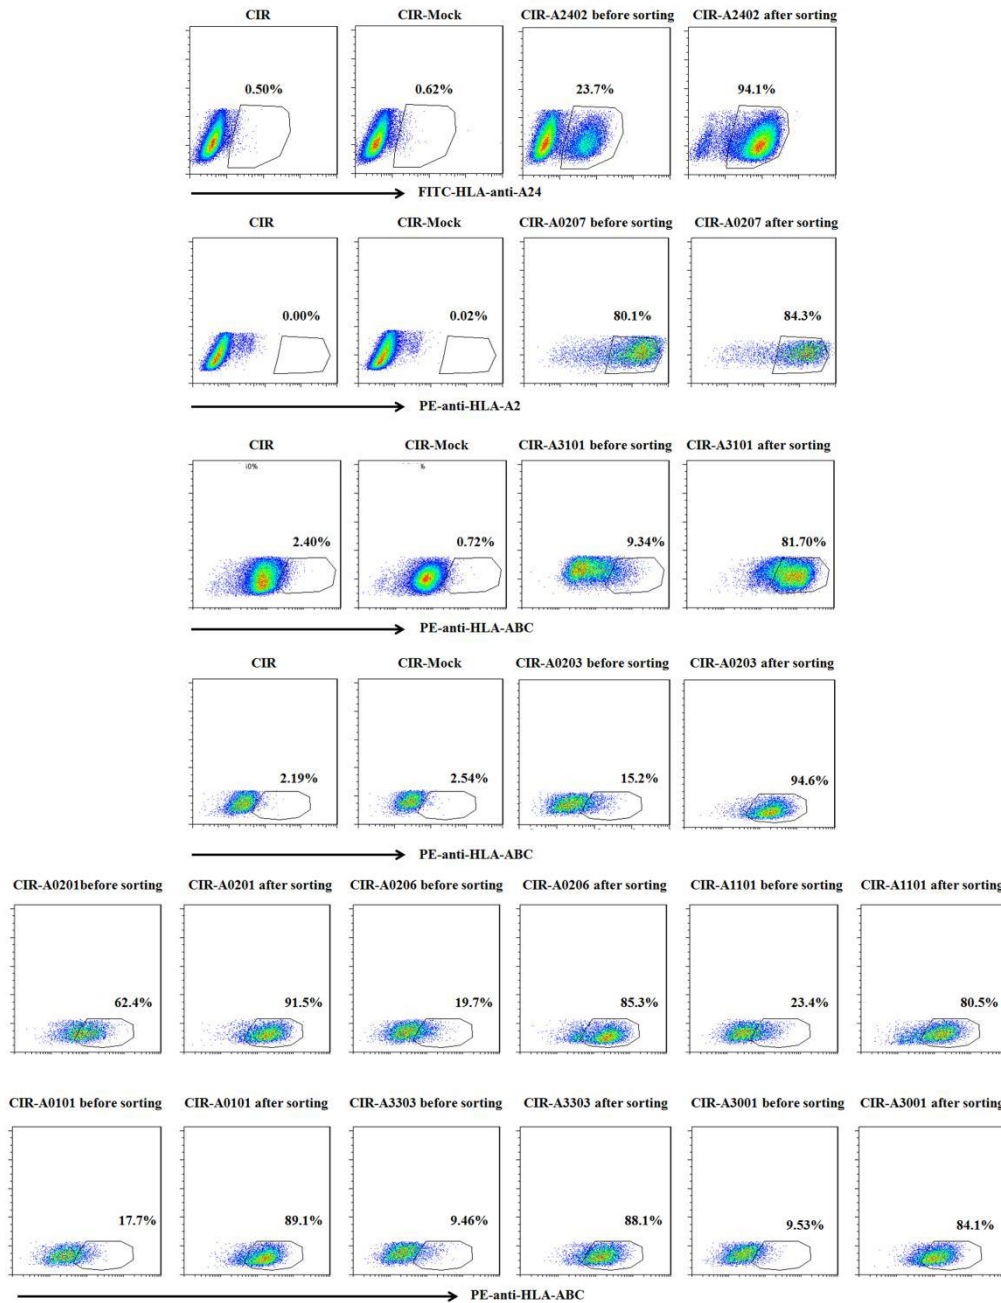

**Figure S5: Ten HMy2.CIR cell lines expressing indicated HLA-A allotype.** The transfected Hmy2.1 CIR cell lines expressing HLA-A2402, A0207, A0201, A0203, A0206, A0101, A1101, A3101, A3303, or A3001 were generated, respectively, and stained with FITC-anti-HLA-A24, PE-anti-HLA-A2.1 or PE-anti-HLA-ABC (W6/32), then sorted by

flow cytometry. The purity of these transfected HMy2.CIR cell lines was 80% to 94% after sorting.

Figure S6:

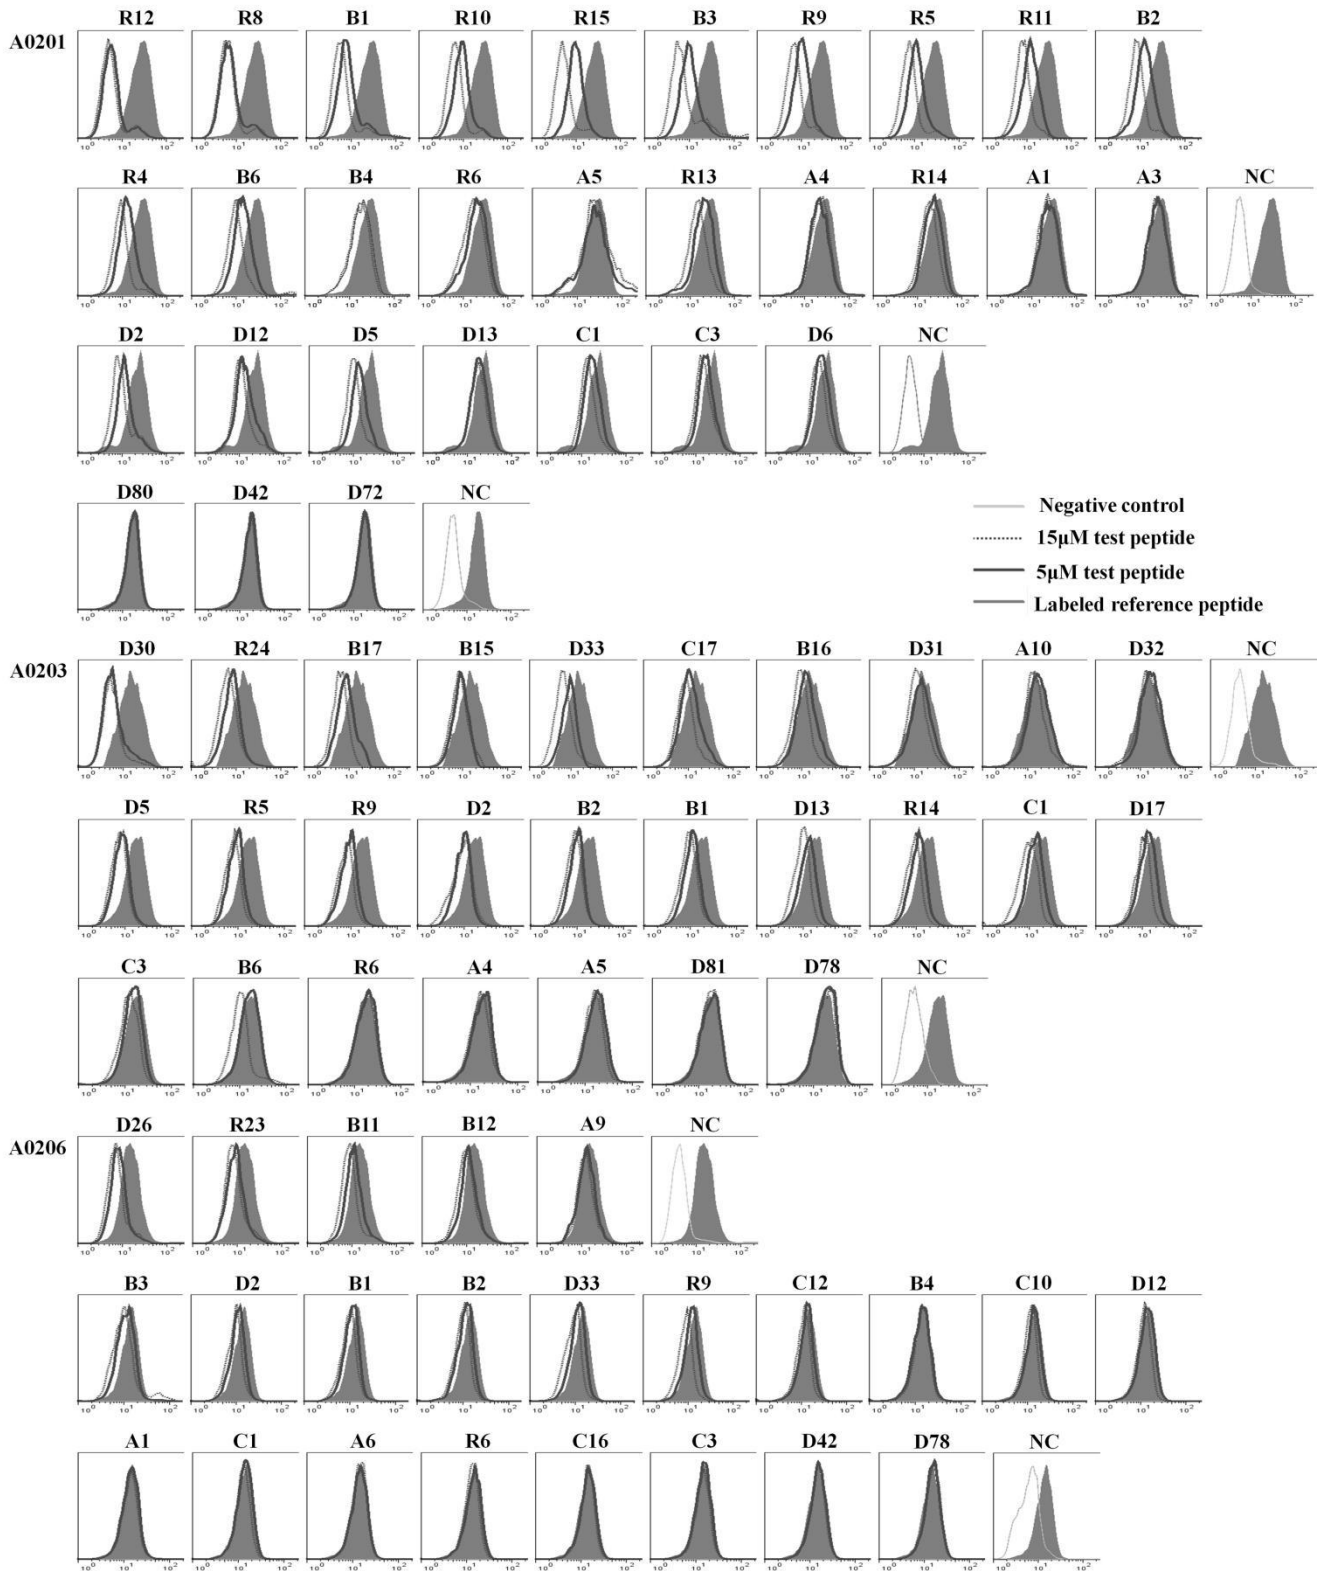

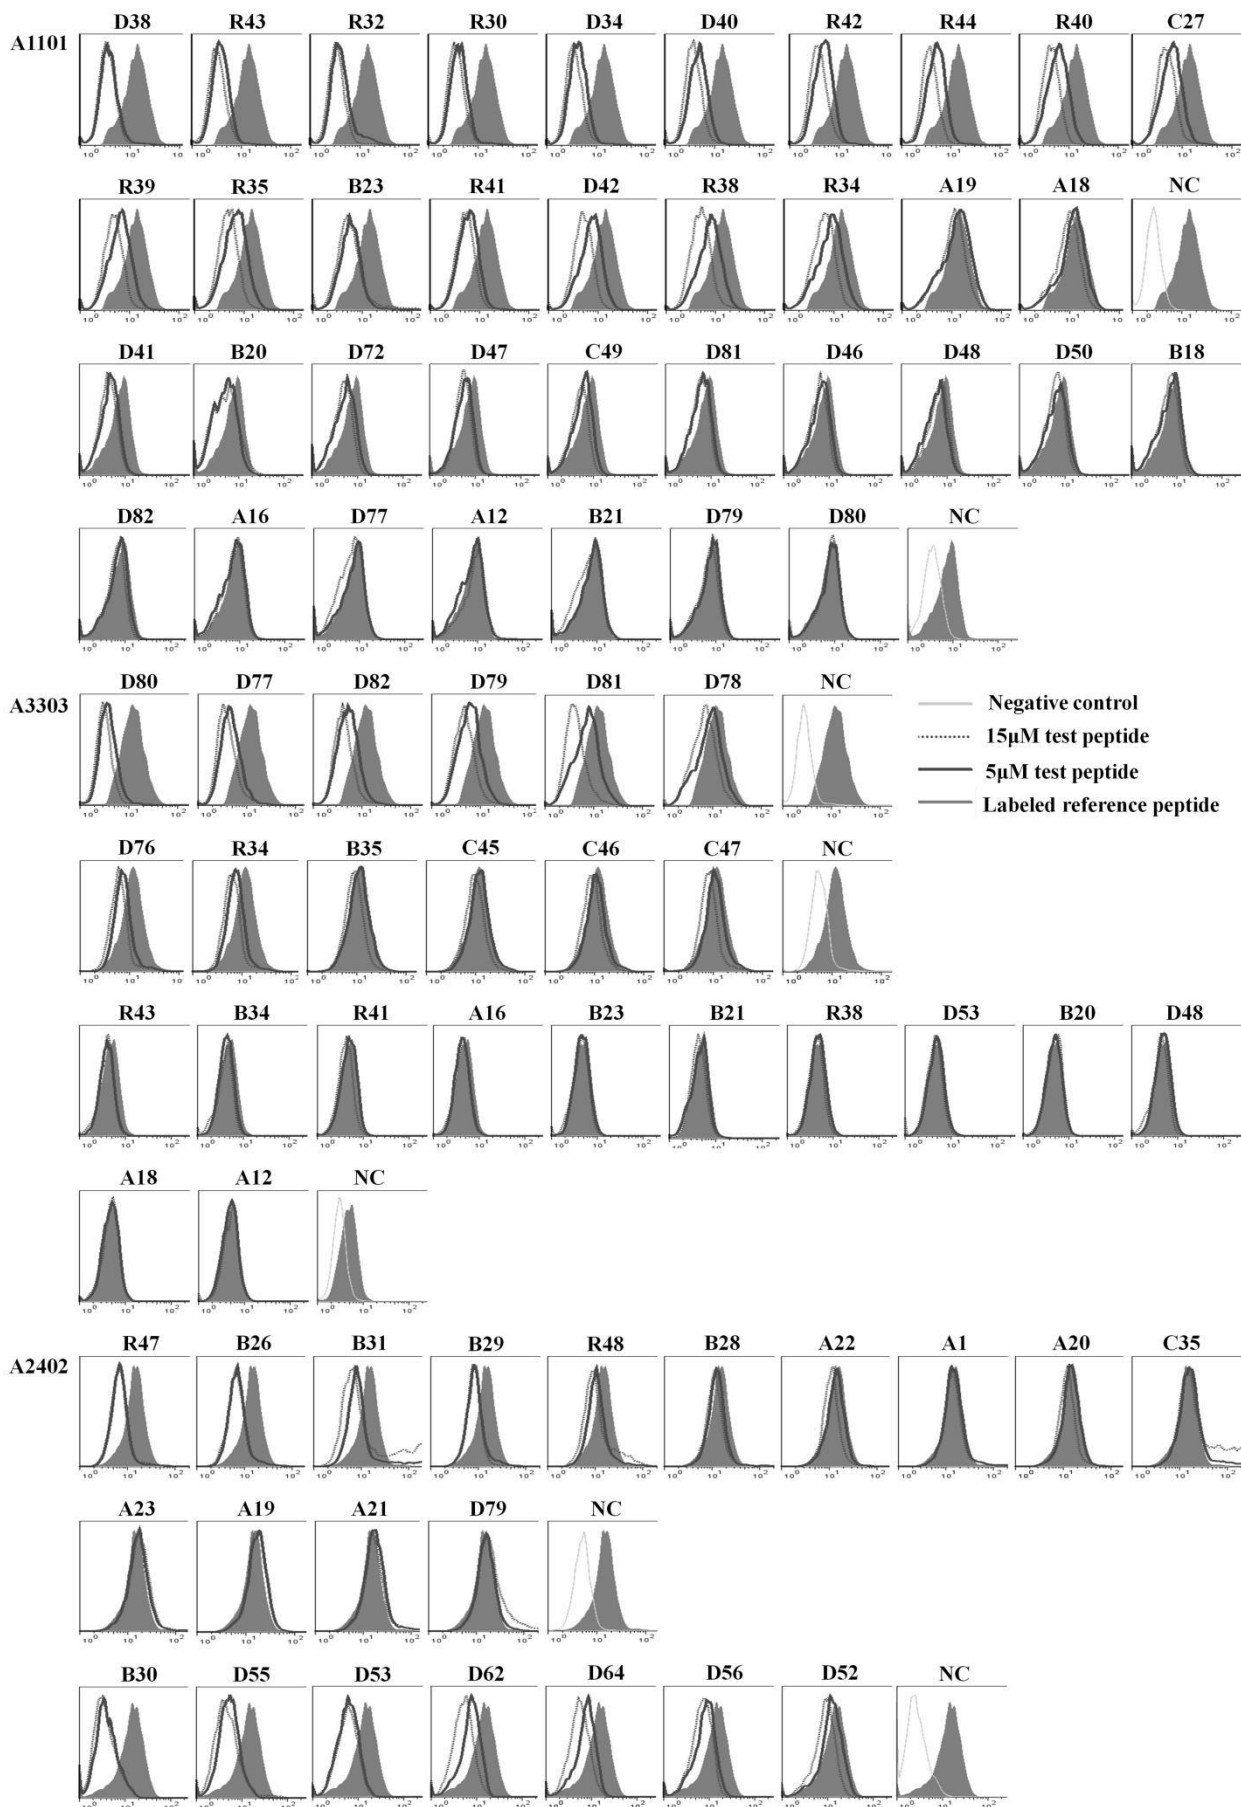

**Figure S6: Binding affinity of 120 validated epitopes with HLA-A allotypes as defined by peptide competitive binding experiments.** A series of unlabeled epitope peptides of SRAS-CoV-2 were coincubated, at 5 $\mu$ M and 15 $\mu$ M respectively, with fluorescent-labeled reference peptides and CIR cell lines expressing the corresponding HLA-A molecules for 24 hours. Then the competitively binding inhibition (%) of the epitope peptide at 5 $\mu$ M and 15 $\mu$ M was calculated by measuring the CIR cells fluorescence strength. Shown are the histograms of two concentrations (5 $\mu$ M and 15 $\mu$ M). Black solid line was the histogram of 5 $\mu$ M test peptide; dotted line was the histogram of 15 $\mu$ M, test peptide; black filled line was the maximal fluorescence (FITC-labeled reference peptide without competitive peptides) while the lightest gray line was the negative control (background fluorescence with 1640 alone). NC: the maximal fluorescence (FITC-labeled reference peptide without competitive peptides) and background fluorescence with 1640 alone.

Figure S7:

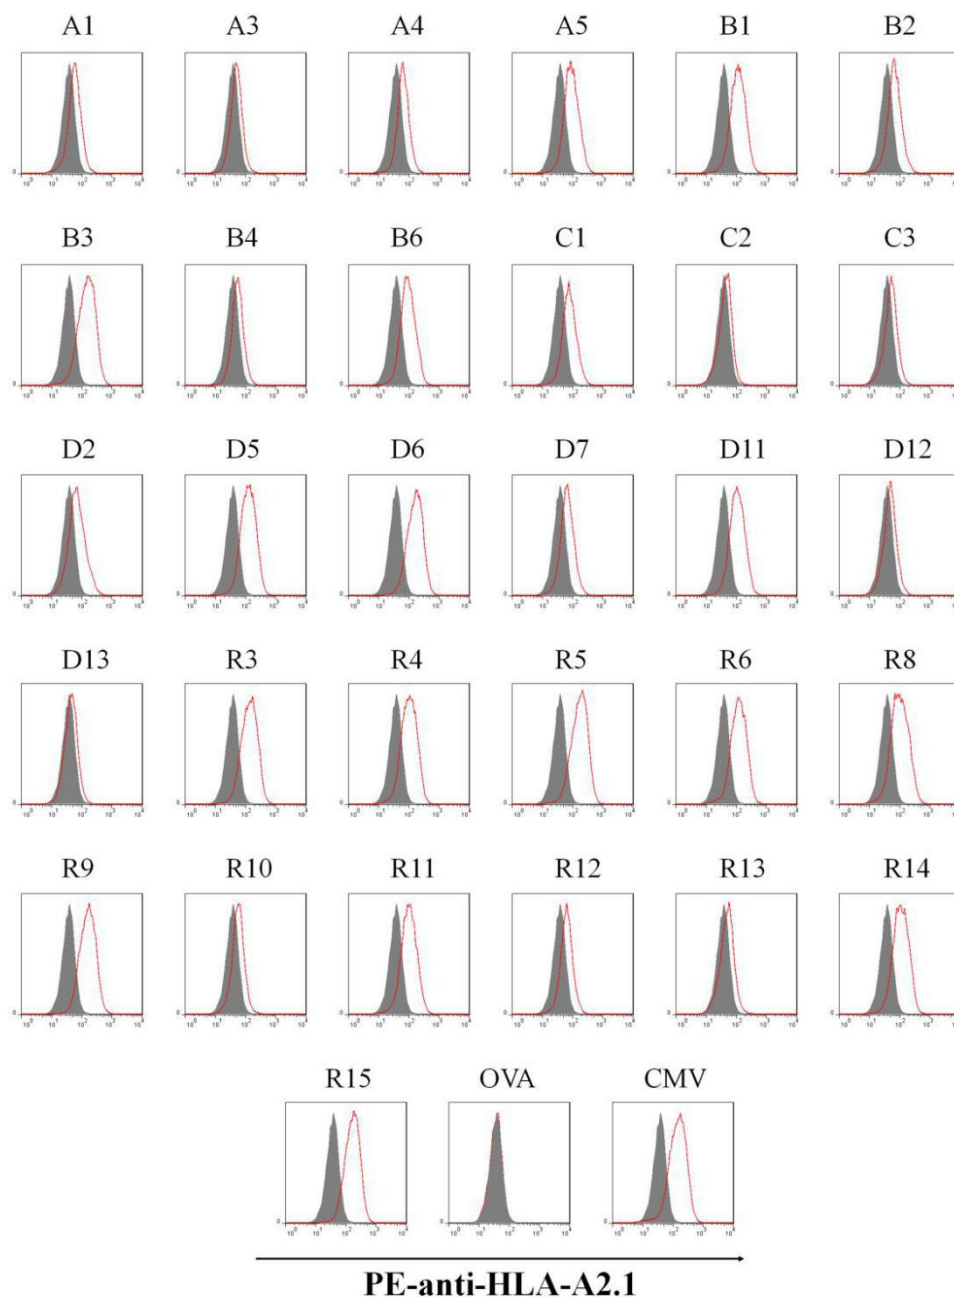

**Figure S7: Binding affinity of 31 validated epitopes with HLA-A0201 molecule as defined by T2 cell binding assay.** T2 cells were incubated with single peptide of the 31 epitopes, or with CMVpp65<sub>495-503</sub> peptide as positive control, OVA<sub>257-264</sub> peptide as negative control, or no peptide and  $\beta$ 2-m for 16 hours, then followed by PE-labeled anti-HLA-A2.1 antibody staining to test the up-regulation of HLA-A0201 molecules onto T2 cells. The fluorescence index (FI) was calculated with flow cytometry. Red solid line was the histogram of indicated peptides while the black filled line was background fluorescence of T2 cells alone without peptide. OVA: OVA<sub>257-264</sub> peptide; CMV: CMVpp65<sub>495-503</sub> peptide.

Figure S8:

A Correlation between peptide competitive binding assay and T2 cell binding assay

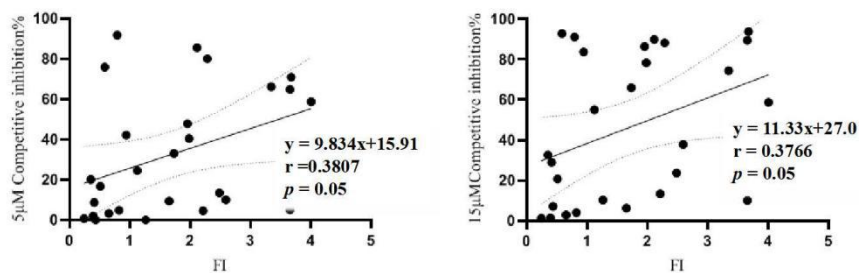

B Correlation between peptide competitive binding assay and *in silico* prediction

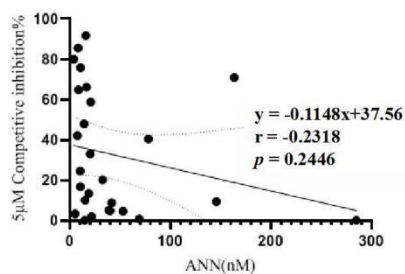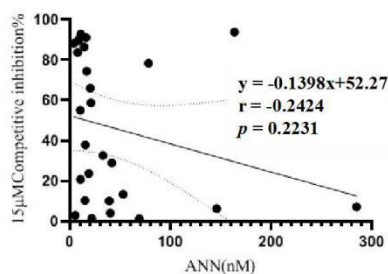

C Correlation between *in silico* prediction and T2 cell binding assay

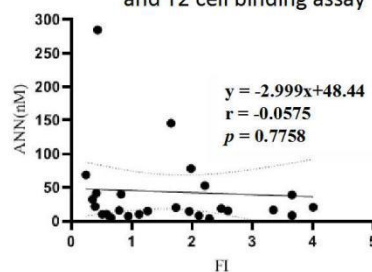

**Figure S8: Correlation coefficient across approaches for the 27 validated epitope peptides restricted by HLA-A0201 molecules.** 5µM or 15µM competitive inhibition % means the competitively binding inhibition (%) of validated epitope peptide at 5µM or 15µM; FI means the fluorescence index in T2 cell binding assay; ANN(nM) means the *in silico* predicted affinity using IDEB ANN algorithm.  $P < 0.05$  indicates that the correlation analysis had statistical significance.

Figure S9:

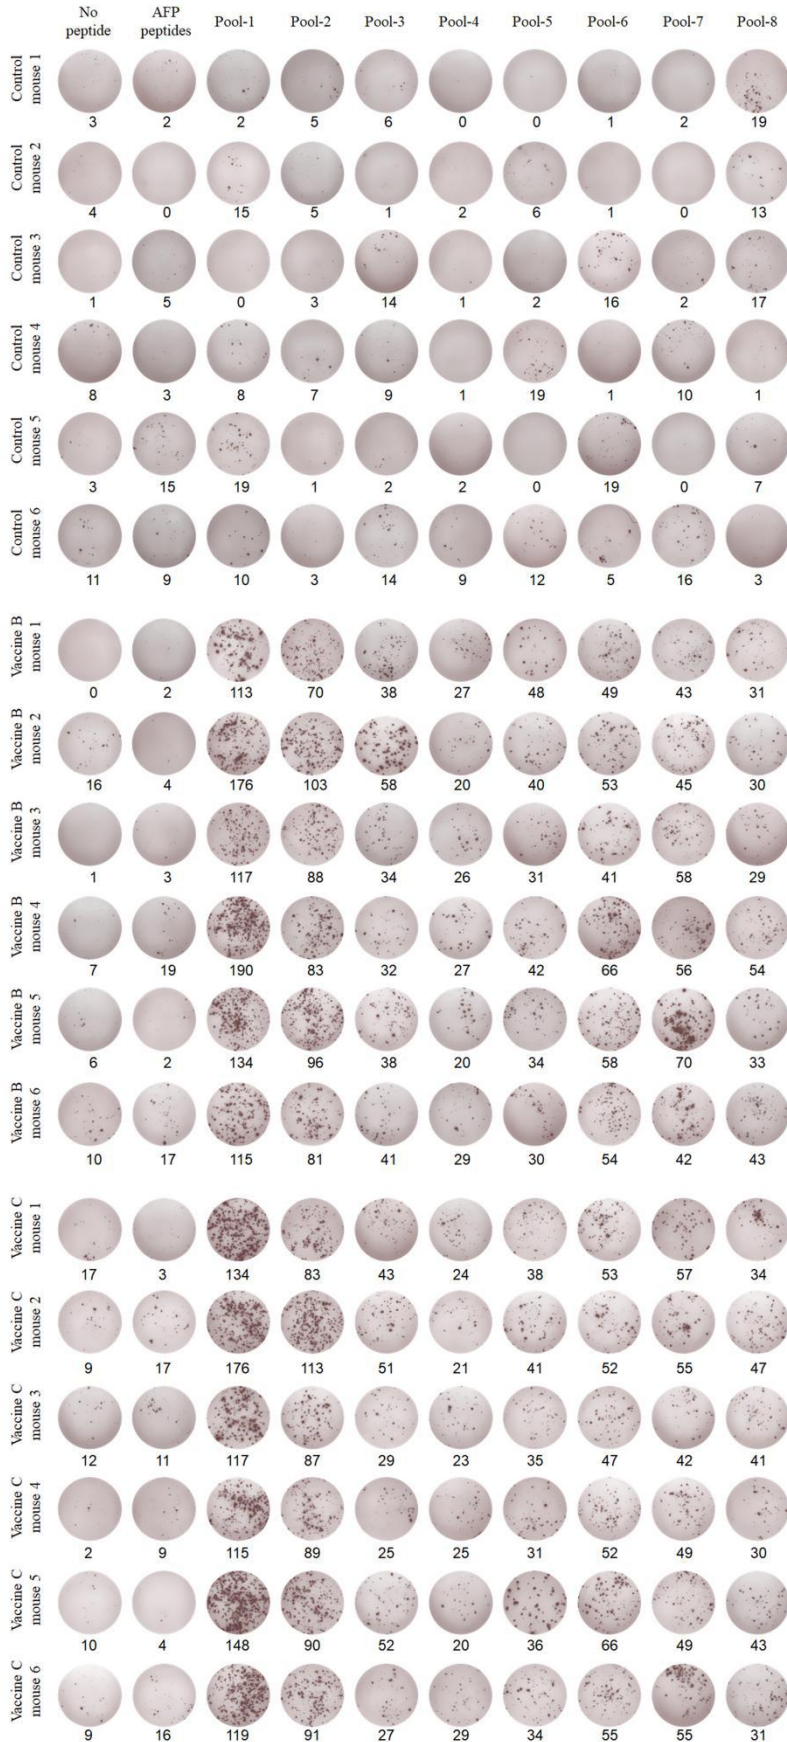

**Figure S9: IFN- $\gamma$  ELISPOT spot plots against the individual peptide pools in hybrid mice.** Splenocytes from each primed hybrid mouse were harvested 7 days after the last booster and *ex vivo* stimulated with 8 different peptide pools covering the 31 VEPs or with AFP peptides (AFP<sub>158-166</sub>, AFP<sub>424-432</sub>) as irrelevant control, or without peptide as negative control, and followed by IFN- $\gamma$  ELISPOT. The hybrid mice: the hybrid of HLA-A0201<sup>+/+</sup>/DR1<sup>+/+</sup>/H-2- $\beta$ 2m<sup>-/-</sup>/I-A $\beta$ <sup>-/-</sup> C57BL/6 mice and WT C57BL/6 mice; Control group: normal saline; Vaccine B group: R848/peptides vaccines; Vaccine C group: Poly I: C/peptides vaccines.



Figure S10:

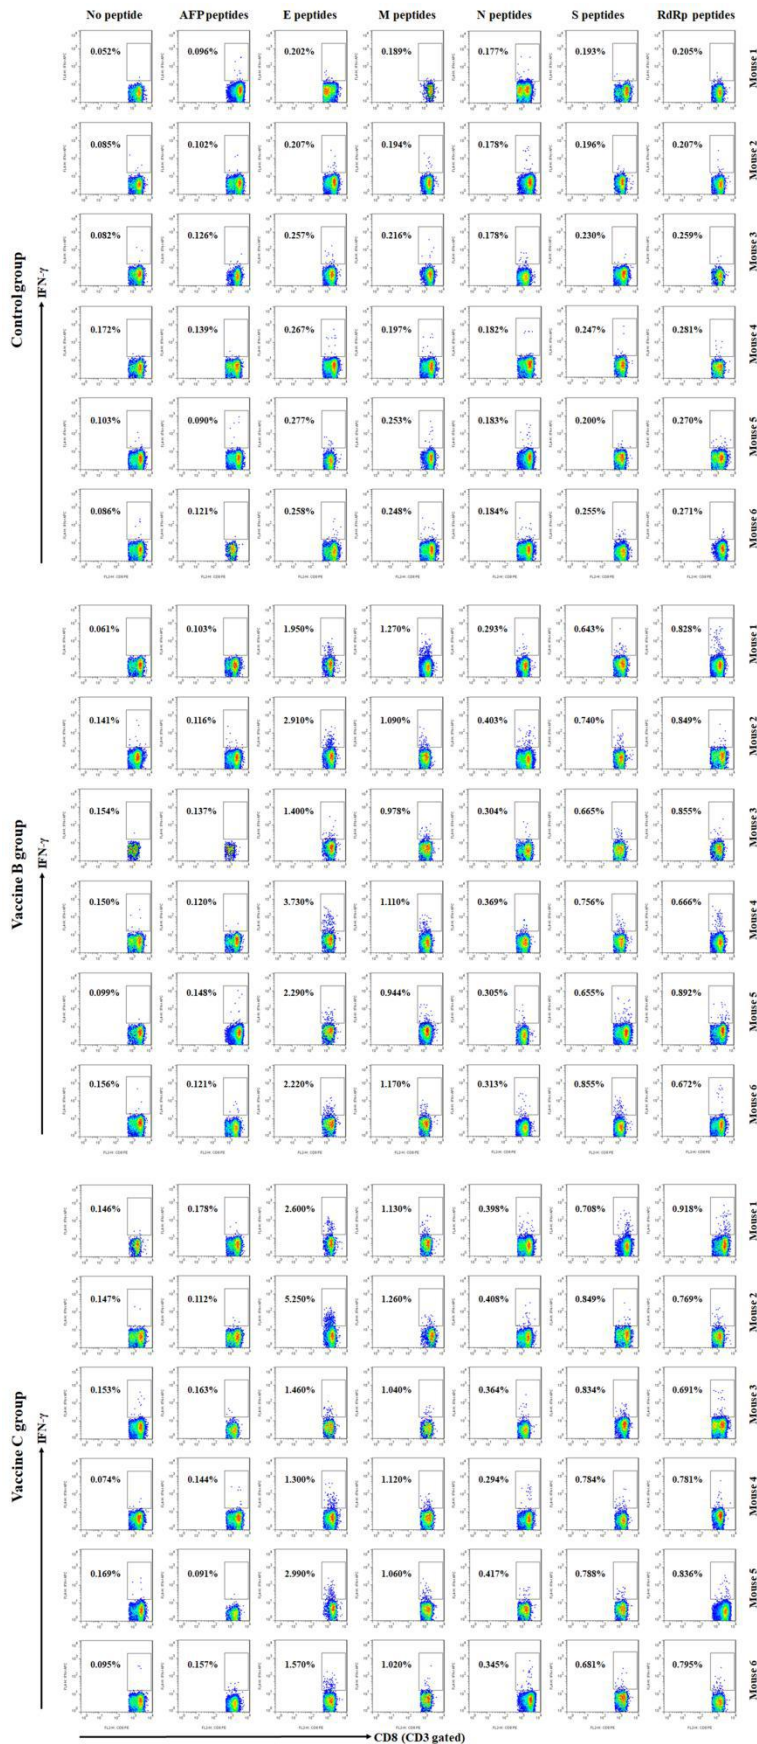

**Figure S10: Flow plots of IFN- $\gamma$  ICS responding to the individual peptide pools in hybrid mice.** Splenocytes from each primed hybrid mouse were harvested 7 days after the last booster and *ex vivo* stimulated with 5 different peptide pools (1 pool/protein) covering the 31 VEPs or with AFP peptides (AFP<sub>158-166</sub>, AFP<sub>424-432</sub>) as irrelevant control, or without peptide as negative control, and followed by IFN- $\gamma$  ICS. The data in left upper quadrant mean the frequencies of IFN- $\gamma$ <sup>+</sup> T cells in CD3<sup>+</sup>/CD8<sup>+</sup> cell populations. The hybrid mice were the hybrid of HLA-A0201<sup>+/+</sup>/DR1<sup>+/+</sup>/H-2- $\beta$ 2 m<sup>-/-</sup>/I-A $\beta$ <sup>-/-</sup> C57BL/6 mice and WT C57BL/6 mice; Control group: normal saline; Vaccine B group: R848/peptides vaccines; Vaccine C group: Poly I: C/peptides vaccines.

Figure S11:

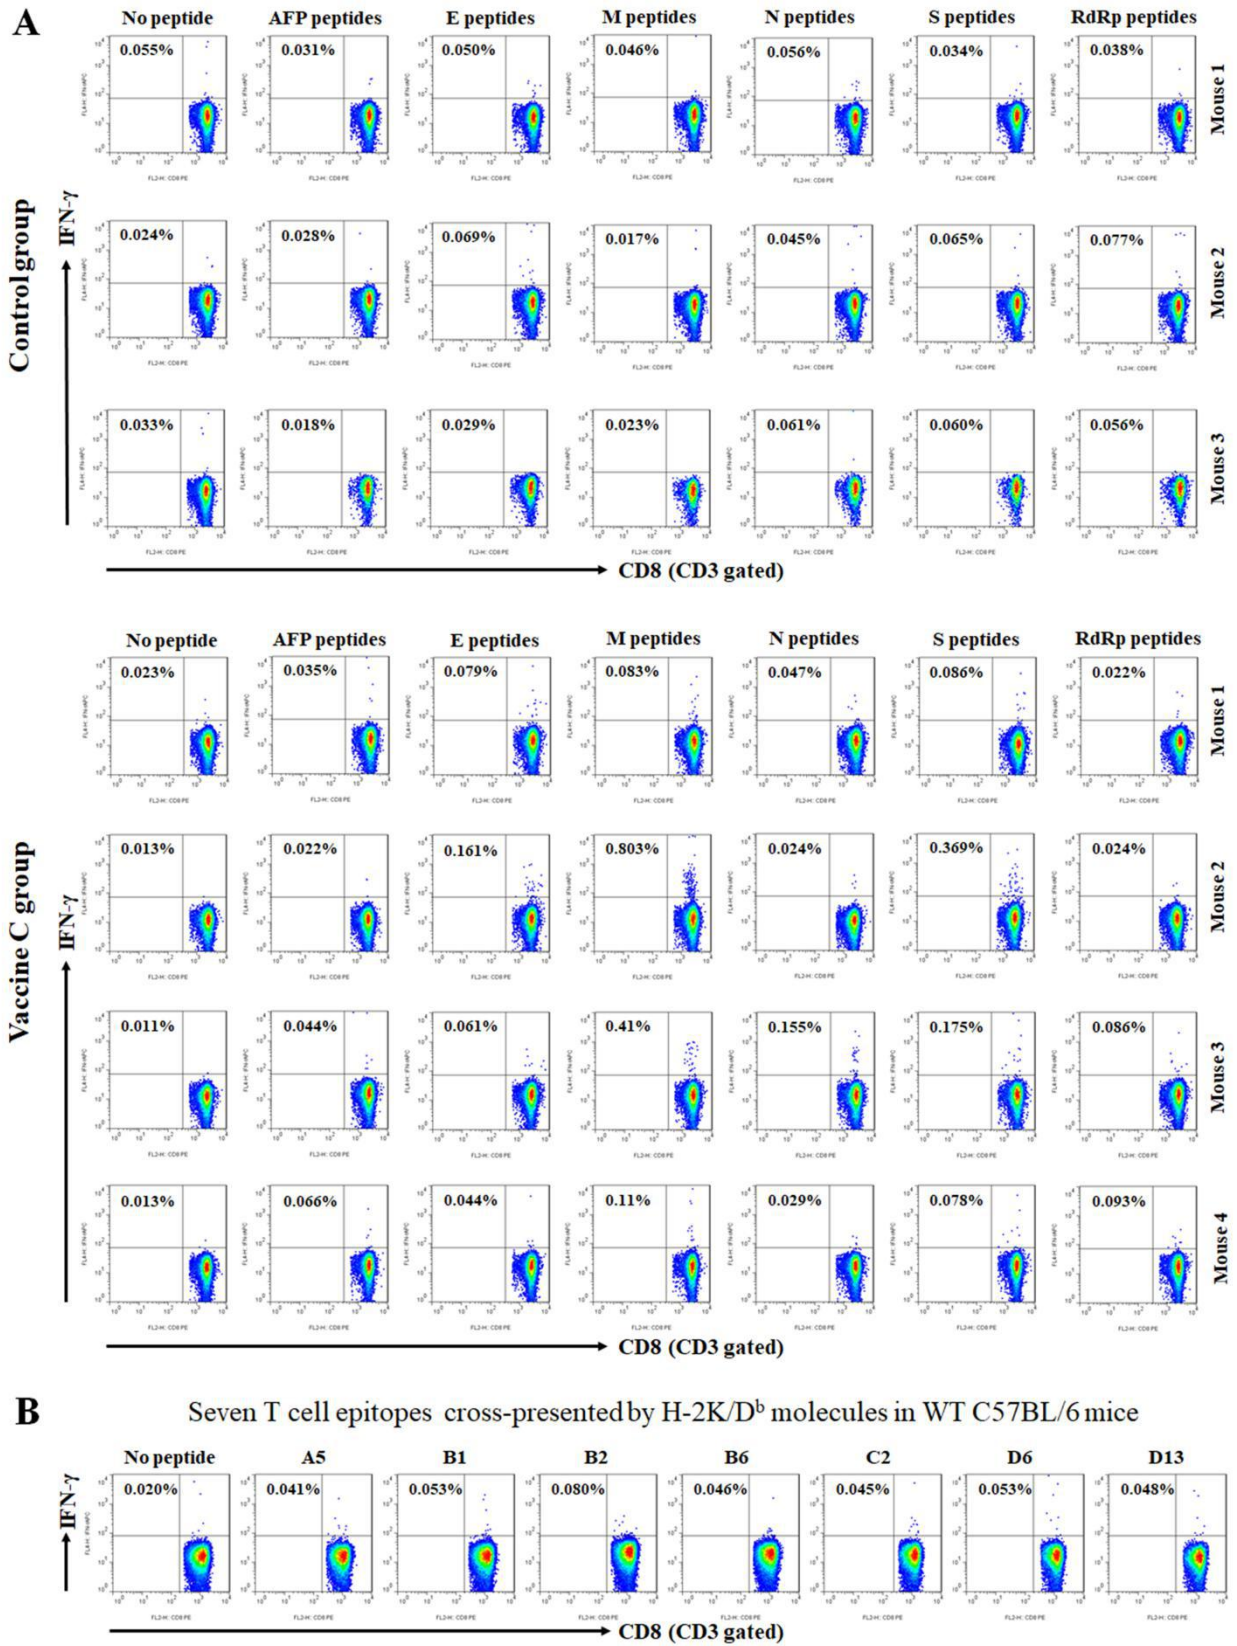

**Figure S11: Flow plots of IFN- $\gamma$  ICS responding to the individual peptide pools after WT mice immunizations.** (A) Splenocytes from each primed WT mouse were harvested 7 days after the last booster and *ex vivo* stimulated with 5 different peptide pools (1 pool/protein) covering the 31 VEPs or with AFP peptides (AFP<sub>158-166</sub>, AFP<sub>424-432</sub>) as irrelevant control, or without peptide as negative control, and followed by IFN- $\gamma$  ICS. The data in left upper quadrant mean the frequencies of IFN- $\gamma$ <sup>+</sup> T cells in CD3<sup>+</sup>/CD8<sup>+</sup> cell populations. (B) 7 of 31 VEPs restricted by HLA-A0201 were identified to be cross-presented by H-2K/D<sup>b</sup> molecules. Splenocytes from each primed WT mouse were harvested as described and *ex vivo* stimulated with single peptide, or without peptide as negative control, and followed by IFN- $\gamma$  ICS. The epitopes were identified as immunogenic peptides when the frequency of IFN- $\gamma$ <sup>+</sup> T cells in CD3<sup>+</sup>/CD8<sup>+</sup> cell population reached 2 times over the negative control. Representative flow plots of the 7 positive epitopes were shown. WT mice: wild type C57BL/6 mice; Control group: normal saline; Vaccine C group: Poly I: C/peptides vaccines.

Figure S12:

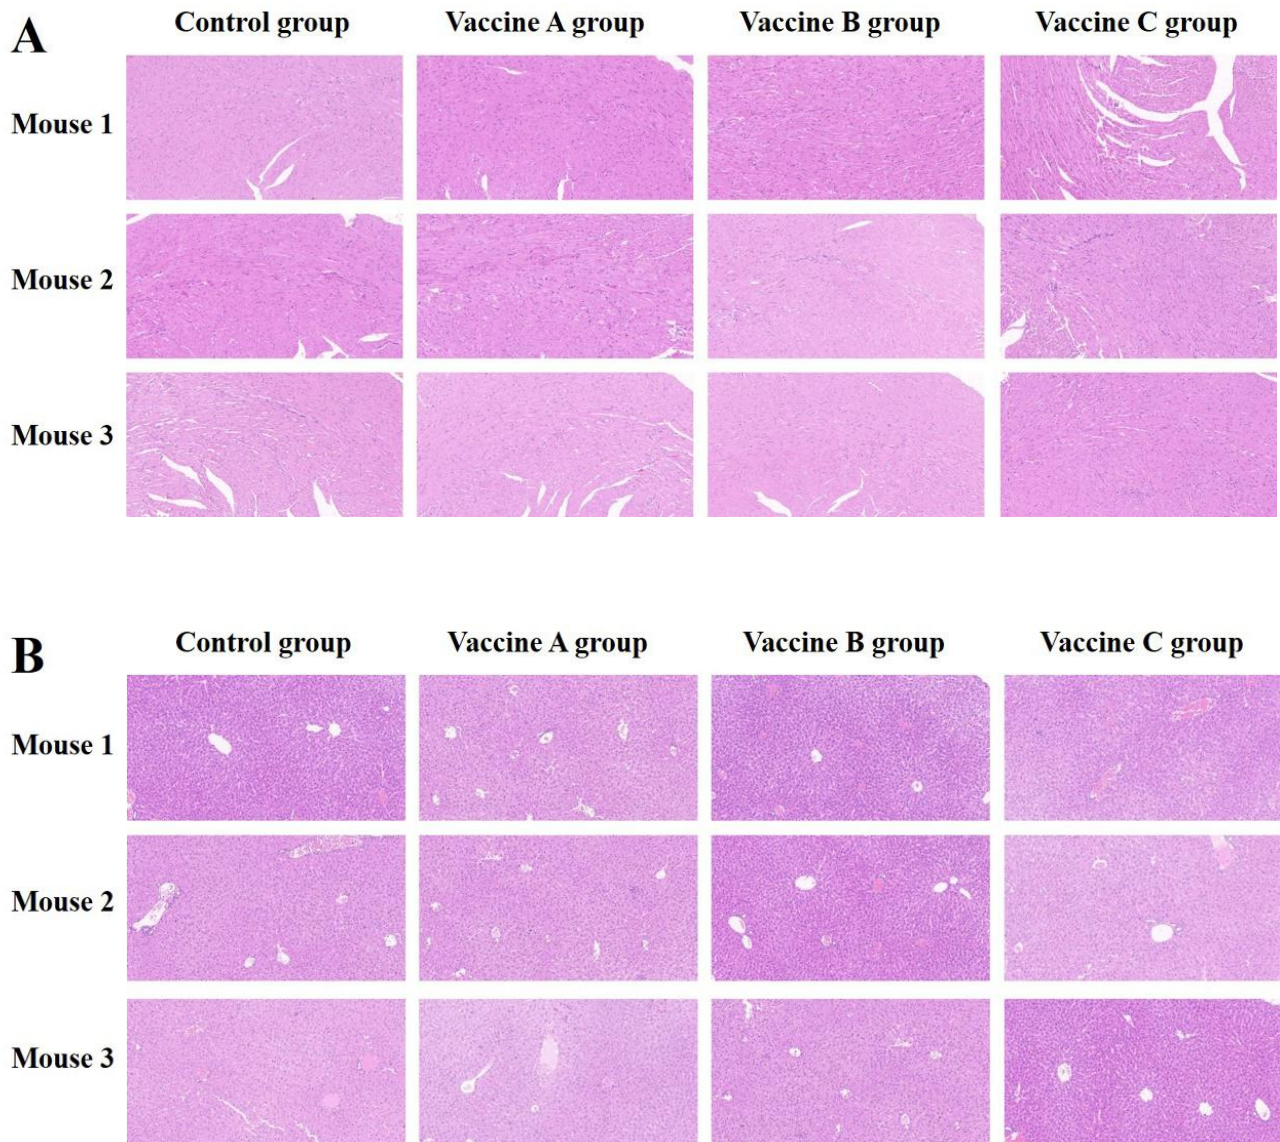

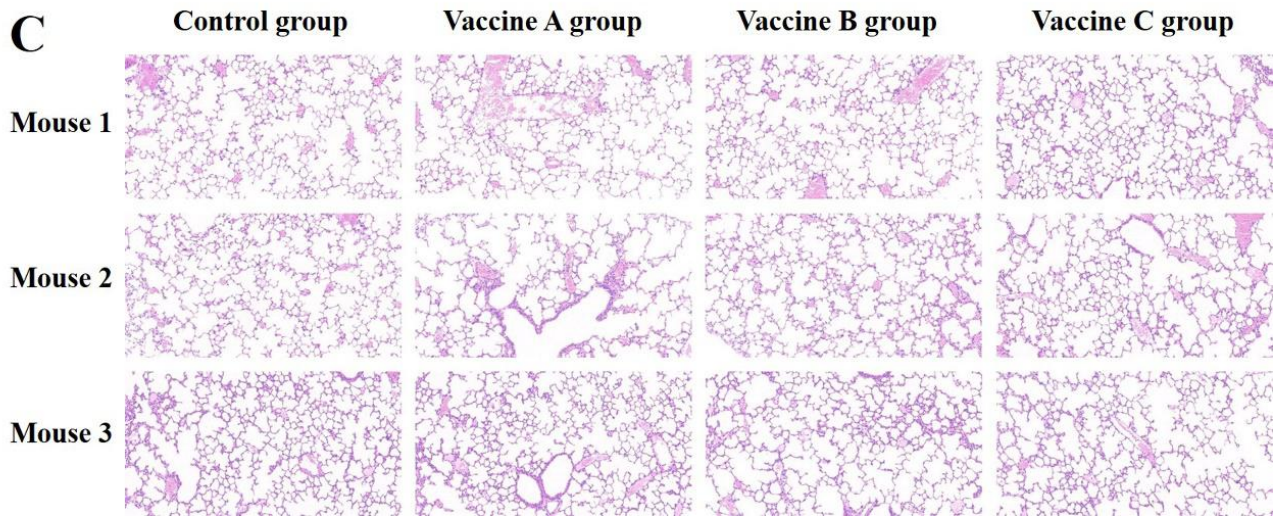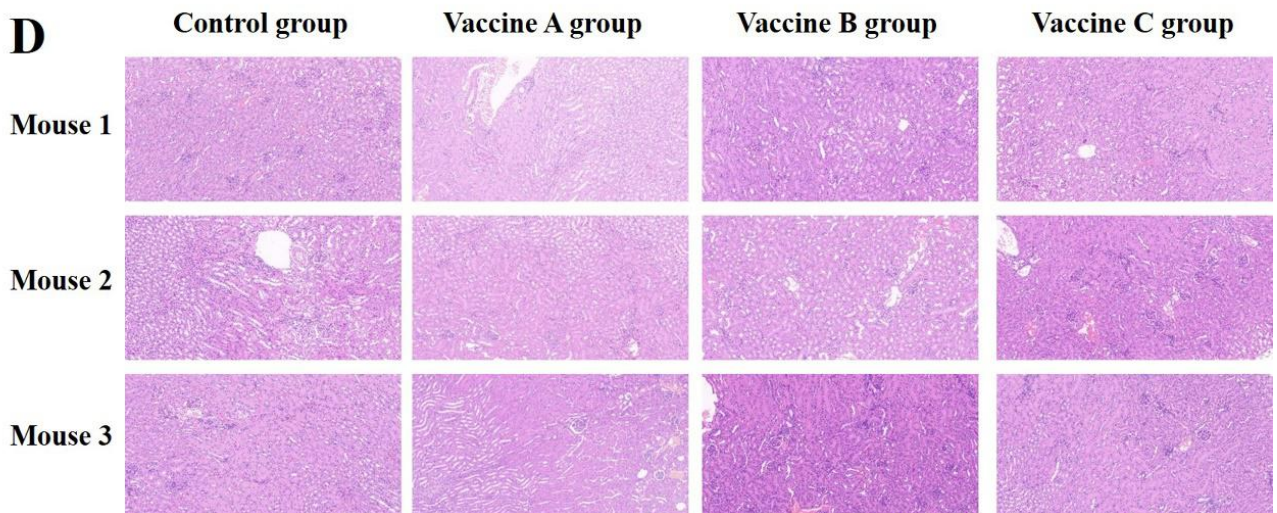

**Figure S12: The peptide cocktail vaccines have no visible toxicity on the organs.** Seven days after the last booster, all mice were executed. Heart, liver, lung and kidney were taken out, immersed and were finally stained with Hematoxylin-Eosin. No obvious pathological damage was found in all organs in all groups. The representative HE staining of heart, liver, lung and kidney in each mouse from four groups were exhibited in (A), (B), (C) and (D), respectively. Control group: normal saline plus PLGA-NPs; Vaccine A group: PLGA-NP/peptides vaccine; Vaccine B group: R848/peptides vaccine; Vaccine C group: Poly I: C/peptides vaccine.

Figure S13:

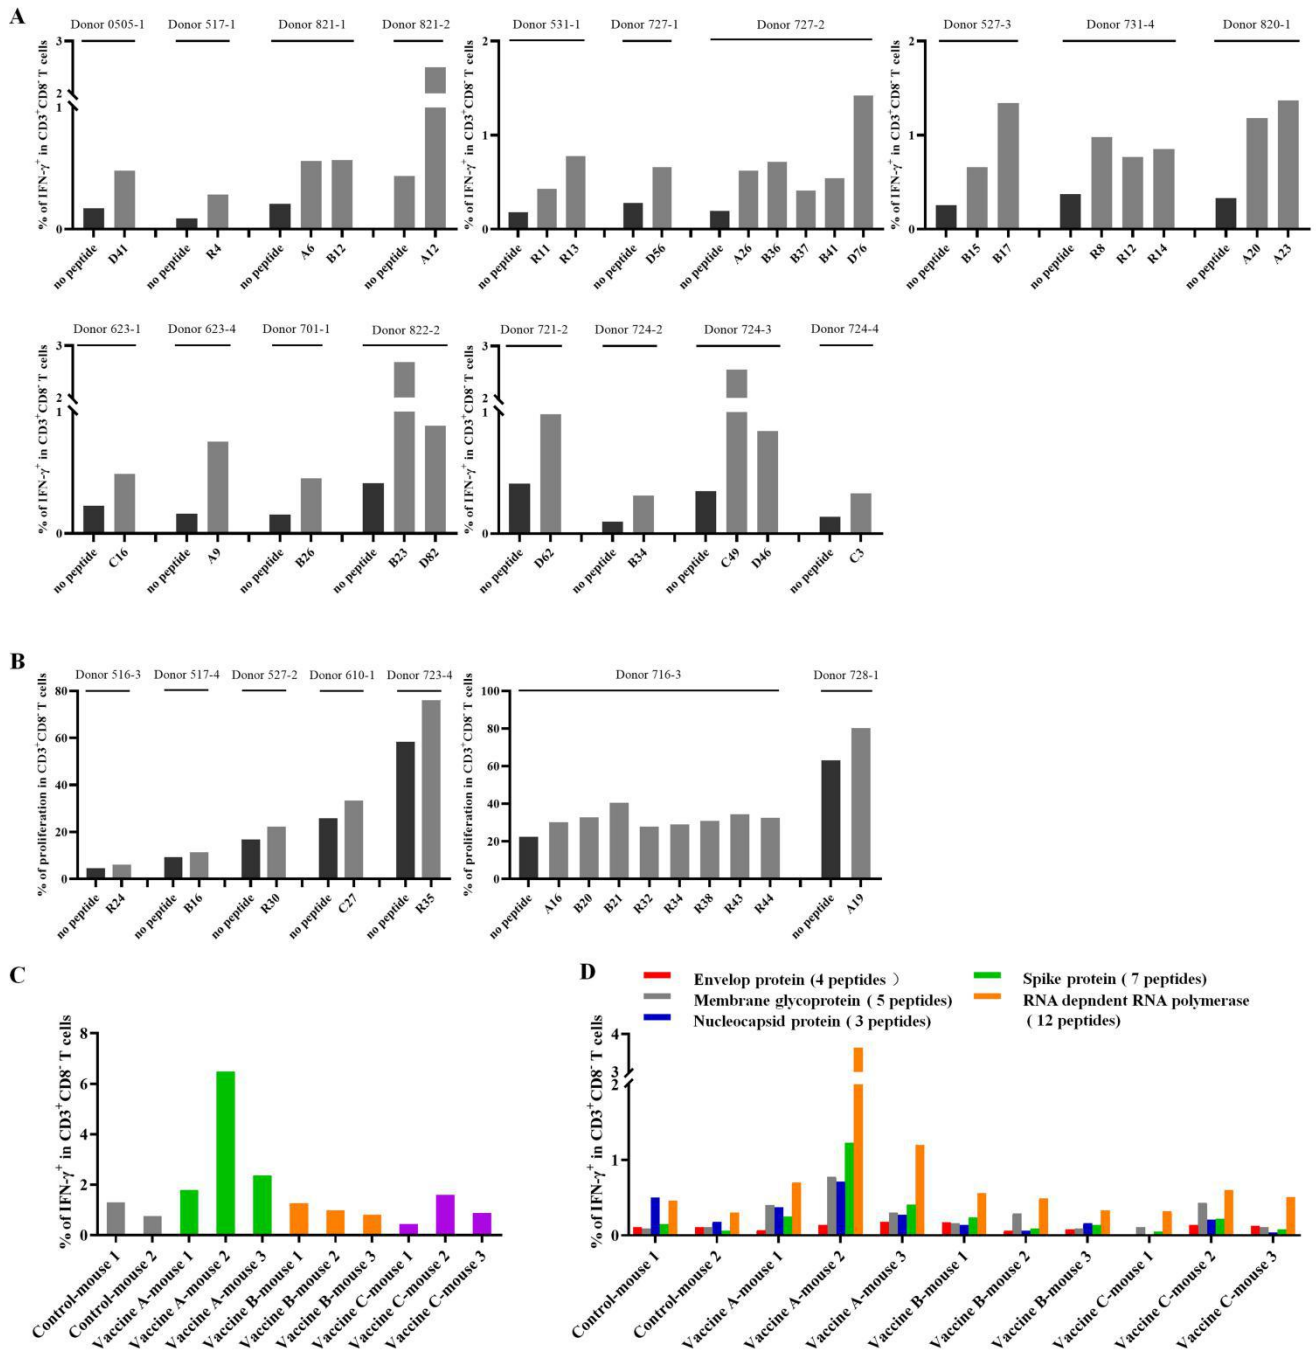

**Figure S13: 44 CD8<sup>+</sup> T cell epitope peptides elicited CD4<sup>+</sup> T cell responses in DC-peptide-PBL co-cultures, but not in transgenic mice.** DCs were induced for 7 days from unexposed healthy donor's PBMCs, then coincubated with candidate epitope peptides and autologous PBLs for 14 days. Cells were harvested and stimulated by corresponding candidate peptides for another 16 hours followed by IFN- $\gamma$  ICS. In some co-culture wells,

the DC and peptides were co-cultured with CFSE-prelabeled PBLs for 14 days, and cells were then harvested to detect the proliferation percentage of T cell. **(A)** The frequency of IFN- $\gamma$ <sup>+</sup> T cells in CD3<sup>+</sup>/CD8<sup>-</sup> T cell population for each positive epitope peptide and each responded donor. **(B)** The proliferation percentage of T cells in CD3<sup>+</sup>/CD8<sup>-</sup> cell population for each positive epitope peptide and each responded donor. Then, 31 VEPs restricted by HLA-A0201 were used to generate peptide cocktail vaccines in three formulations, and followed by three rounds vaccination of HLA-A0201/DR1 transgenic C57BL/6 mice. Splenocytes were collected 7 days after the last booster and *ex vivo* stimulated with five peptide pools (1 pool/protein) covering the 31 VEPs or with AFP peptides (AFP<sub>158-166</sub>, AFP<sub>424-432</sub>) as irrelevant control, or without peptide as negative control, and followed by IFN- $\gamma$  ICS. **(C)** Total frequency of IFN- $\gamma$ <sup>+</sup> T cells reacting to all peptide pools in CD3<sup>+</sup>/CD8<sup>-</sup> cell population in each mouse. **(D)** Deconvolution of the total frequency in each mouse from C into the single SARS-CoV-2 protein. Control group: normal saline and PLGA-NPs; Vaccine A group: PLGA-NPs/peptides vaccine; Vaccine B group: R848/peptides vaccine; Vaccine C group: poly I: C/peptides vaccines.
